# 1 **ConnecTF: A platform to build gene networks by integrating transcription factor-target gene** 2 **interactions**

3  
4 Brooks, M.D.<sup>1</sup>, Juang, C.-L.<sup>1</sup>, Katari, M.S.<sup>1</sup>, Alvarez, J.M.<sup>2,3</sup>, Pasquino, A.V.<sup>1</sup>, Shih, H.-J.<sup>1</sup>, Huang,  
5 J.<sup>1</sup>, Shanks, C.<sup>1</sup>, Cirrone, J.<sup>4</sup>, Coruzzi, G.M.<sup>1</sup>

6 1. Center for Genomics and Systems Biology, Department of Biology, New York University, NY,  
7 USA.

8 2. Centro de Genómica y Bioinformática, Facultad de Ciencias, Universidad Mayor, Santiago,  
9 Chile.

10 3. Millennium Institute for Integrative Biology (iBio), Santiago, Chile.

11 4. Courant Institute for Mathematical Sciences, Department of Computer Science, New York  
12 University, NY, USA.

## 13 14 **Abstract**

15 Deciphering gene regulatory networks (GRNs) is both a promise and challenge of systems biology.  
16 The promise is identifying key transcription factors (TFs) that enable an organism to react to changes  
17 in its environment. The challenge is constructing GRNs that involve hundreds of TFs and hundreds  
18 of thousands of interactions with their genome-wide target genes validated by high-throughput  
19 sequencing. To address this challenge, we developed ConnecTF, a species-independent web-based  
20 platform for constructing validated GRNs and to refine inferred GRNs via combined analysis of  
21 genome-wide studies of TF-target gene binding, TF-target regulation and other TF-centric omic data.  
22 We demonstrate the functionality of ConnecTF in three case studies, showing how integration within  
23 and across TF-target datasets uncovers biological insights. Case study 1 uses integration of TF-target  
24 gene regulation and binding datasets to uncover mode-of-action and identify potential TF partners for  
25 14 TFs in abscisic acid signaling. Case study 2 demonstrates how genome-wide TF-target data and  
26 automated functions in ConnecTF are used to conduct precision/recall analysis and pruning of an  
27 inferred GRN for nitrogen signaling. In case study 3, we use ConnecTF to chart a network path from  
28 NLP7, a master TF in nitrogen signaling, to direct secondary TF<sub>2</sub>s, to its indirect targets, in an  
29 approach called Network Walking. The public version of ConnecTF (<https://ConnecTF.org>) contains  
30 3,738,278 TF-target interactions for 423 TFs in Arabidopsis, and 839,210 TF-target interactions for  
31 139 TFs in maize. The database and tools in ConnecTF should advance the exploration of GRNs in  
32 plant systems biology applications for models and crops.

## 33 Introduction

34

35 Deciphering gene regulatory networks (GRN) is an important task, as it can reveal regulatory loci,  
36 transcription factors (TFs), crucial for development, stress responses, or disease, with potential  
37 applications in agriculture and medicine (Petricka et al., 2012; Chatterjee and Ahituv, 2017; Gupta  
38 and Singh, 2019). However, integrating experimentally validated connections between TFs and their  
39 genome-wide target genes in such GRNs remains a challenge.

40

41 With the advent of next-generation sequencing, there are a growing number of methods to validate  
42 TF-target gene connections within GRNs, each with its own set of benefits and drawbacks. Methods  
43 that provide evidence for where a TF is likely to bind to the genome include; chromatin  
44 immunoprecipitation (ChIP-seq), DNA affinity purification sequencing (DAP-seq) (O'Malley et al.,  
45 2016), and cis-motif enrichment. To determine when TF-binding leads to target gene regulation  
46 requires the integration of TF-binding data with TF-regulation datasets. However, large-scale  
47 datasets that validate TF-target gene regulation data are sparse relative to TF-target gene binding  
48 data. This is largely due to the low throughput nature of TF-perturbation approaches in planta (e.g.  
49 overexpression or mutants). Thus, there is a need for higher throughput methods to rapidly identify  
50 direct regulated TF-targets in plants. One such method is the Transient Assay Reporting Genome-  
51 wide Effects of Transcription factors (TARGET) which uses temporal controlled TF nuclear entry to  
52 identify direct regulated TF-targets in isolated plant cells (Bargmann et al., 2013; Brooks et al.,  
53 2019).

54

55 Such large-scale datasets for TF-target binding or regulation can be used to verify predictions of TF-  
56 target gene connections in GRNs (Marbach et al., 2012; Banf and Rhee, 2017; Mochida et al., 2018;  
57 Kulkarni and Vandepoele, 2019). Validated TF-target interactions can also be used as priors (e.g.  
58 “ground truths”) to train machine learning in network inference methods (Greenfield et al., 2013;  
59 Petralia et al., 2015; Cirrone et al., 2020), and/or as a gold standard with which to benchmark/refine  
60 the accuracy of predicted TF-target interactions in learned GRNs (Marbach et al., 2012; Varala et al.,  
61 2018; Brooks et al., 2019). We have previously shown how the integration of TF-target binding with  
62 TF-target regulation datasets can reveal distinct modes-of-action of a TF on induced vs. repressed  
63 gene targets (Brooks et al., 2019).

64

65 Platforms that facilitate access to and integration of such large-scale datasets that validate TF-target  
66 gene interactions are crucial to accelerate studies of validated and inferred GRNs. To this end, there  
67 are efforts to aggregate TF-target datasets, largely TF-binding and cis-motif elements, for many  
68 species, including human (Han et al., 2018), yeast (Monteiro et al., 2019), *E. coli* (Santos-Zavaleta et  
69 al., 2019), and Arabidopsis (Yilmaz et al., 2010; Kulkarni et al., 2018; Tian et al., 2019). There are  
70 also web portals that provide access to specific experimental datasets that support TF-target binding,  
71 for example the Plant Cistrome database for large scale assays of in vitro TF-target binding (DAP-  
72 seq) (O'Malley et al., 2016). Primarily, these platforms allow users to query a TF and obtain a list of  
73 TF-bound target genes or vice versa.

74

75 Despite these advances, few, if any, platforms enable a combined analysis of TF-bound genes, TF-  
76 regulated genes, and co-expression data, or the ability to combine such datasets to refine/validate  
77 predicted GRNs. An important feature missing from most available web tools is the ability to  
78 integrate genome-wide targets of a single TF validated by different experimental approaches (e.g.  
79 ChIP-seq, DAP-Seq and RNA-seq), captured under the same or different experimental conditions. A  
80 second feature that is currently lacking is the ability to compare the validated targets of multiple TFs  
81 and determine their hierarchy in a GRN, as they relate to a set of user-defined genes such as a  
82 pathway of interest. Finally, tools are also needed to facilitate the refinement/pruning of predicted  
83 GRNs by using the validated TF-target interactions from genomic studies to perform precision/recall  
84 analysis.

85

86 To meet the need in the plant systems biology community to build, validate and refine GRNs, we  
87 developed ConnecTF, a platform which offers a query interface to access a TF-centric database  
88 consisting of large-scale validated TF-target gene interactions based on TF-target binding (e.g.  
89 ChIP/DAP-Seq) and other gene-to-gene directed (e.g. TF-target regulation,) or undirected (e.g. TF-  
90 TF protein-protein interaction) relationships. We are hosting a publicly available instance of  
91 ConnecTF (<https://ConnecTF.org>) which includes a database of large-scale validated TF-target  
92 interactions containing; TF-binding (in vivo and in vitro), TF-regulation (in planta and in plant cells),  
93 and cis-motif datasets for the model plant Arabidopsis and a crop, maize. The ConnecTF database  
94 currently contains 3,738,278 experimentally validated TF-target edges for 423 TFs in Arabidopsis  
95 (Table 1), and 839,210 experimentally validated TF-target edges for 139 TFs in maize (Supplemental  
96 Table 1). The database also includes the largest TF-target regulation dataset in plants, the direct  
97 regulated targets for 58 TFs in Arabidopsis (Varala et al., 2018; Brooks et al., 2019; Alvarez et al.,  
98 2020; this study)

99

100 We demonstrate in three case studies how the features of ConnecTF and its ability to integrate a large  
101 and diverse variety of validated TF-target gene datasets can provide biological insights into GRNs. In  
102 the first case study, we demonstrate how the integration of validated TF-binding and TF-regulation  
103 datasets enabled us to discover how TFs and their TF-TF partner interactions influence the regulation  
104 of genes in the abscisic acid (ABA) pathway. In the second case study, we demonstrate how  
105 ConnecTF can be used to facilitate precision/recall analysis of inferred nitrogen regulatory networks  
106 using gold standard validated TF-target interactions stored in the ConnecTF database. In the third  
107 case study, we demonstrate how the query system of ConnecTF can be used to integrate validated  
108 TF-target datasets from multiple TFs into a unified network path. Specifically, using the query  
109 functions in ConnecTF, we were able to chart a network path from the direct targets of - NIN-LIKE  
110 PROTEIN 7 (NLP7), a key TF in the nitrogen response (Marchive et al., 2013; Alvarez et al., 2020),  
111 to its indirect targets in planta, using an adaptation of a Network Walking approach (Brooks et al.,  
112 2019). Overall, the database and analysis/integration tools of ConnecTF can be used to advance the  
113 validation of GRNs involved in any pathway using systems biology approaches in models or crops.

114

## 115 **Results**

### 116 *ConnecTF: A query interface and database to integrate TF-target gene interactions of different* 117 *data types.*

118 The ConnecTF platform and database enables researchers to access, analyze and integrate large-scale  
119 experimentally determined datasets on TF-target gene interactions including TF-binding, TF-  
120 regulation, TF-TF protein interactions, and cis-motifs (Table 1 and Supplemental Table 1). An  
121 important feature of ConnecTF is that it not only provides researchers access to the large-scale  
122 validated TF-target datasets housed in the database, but also offers a user-friendly interface to  
123 perform analyses to combine these various datasets for one or many TFs. This includes the ability for  
124 users to provide their own target gene lists or predicted networks and identify the TFs that regulate  
125 their pathway/network of interest. Users can also provide their own inferred networks and use the  
126 validated TF-target data in the ConnecTF database as a gold standard to perform precision/recall  
127 analysis using automated functions in ConnecTF. These applications are described in the three case  
128 studies below.

129  
130 The backend structure and tools available in ConnecTF are species-independent and built using  
131 common software (Supplemental Figure 1). The source code and detailed instructions on how to  
132 setup a personal version of ConnecTF are available on GitHub  
133 ([https://github.com/coruzzilab/connecTF\\_server](https://github.com/coruzzilab/connecTF_server)). This will enable others to setup their own instance  
134 of ConnecTF for public or private sharing of TF-centric genomic data. We are hosting public  
135 versions of ConnecTF with large-scale TF-target validation datasets from Arabidopsis  
136 (<https://ConnecTF.org/>) or maize (<https://Maize.ConnecTF.org/>). The current version of the  
137 Arabidopsis ConnecTF database primarily houses TF-binding or TF-regulation datasets that have  
138 been performed at scale (Table 1), enabling direct comparisons of TF-target interactions. This  
139 database includes; 388 Arabidopsis TFs for which TF-target binding was identified in vitro by DAP-  
140 seq (O'Malley et al., 2016), 21 TF-target binding datasets identified in planta by CHIP-seq (Song et  
141 al., 2016), and 58 TFs for which direct regulated TF-target genes were identified in isolated plant  
142 cells (Varala et al., 2018; Brooks et al., 2019; Alvarez et al., 2020), including 14 TFs from this study  
143 (Supplemental Table 3). For maize, the ConnecTF datasets include the recently reported CHIP-seq  
144 data for 103 TFs performed in isolated maize cells (Tu et al., 2020), TF perturbation and CHIP  
145 binding datasets collected from the literature (Bolduc et al., 2012; Morohashi et al., 2012; Eveland et  
146 al., 2014; Li et al., 2015), as well as in vitro TF-target binding identified by DAP-seq for 32 maize  
147 TFs (Ricci et al., 2019). In addition, for both Arabidopsis and maize, we have included in the  
148 database ATAC-seq (Lu et al., 2019) and DNA Hypersensitivity (DHS) (Sullivan et al., 2014)  
149 datasets, which enables users to filter TF-target interactions (e.g. TF-target gene binding) for those  
150 occurring in open chromatin regions of the different tissues from those studies.

151  
152 A key feature of ConnecTF is its logic-based query system. A query in ConnecTF is built by  
153 constructing a series of constraints to restrict the set of TFs, the set of target genes, the type of  
154 interaction (e.g. TF-target edge type), or other attributes associated with the data. The result of the  
155 query is the network (or subnetwork) of interactions for the selected set of TFs and their targets. This

156 query system allows users to select a single TF or multiple TFs of interest, filter the TF-targets based  
157 on different criteria (e.g. regulation by a signal of interest, e.g. ABA), and integrate validated TF-  
158 target data across multiple TFs. This includes the ability to search for targets of all TFs in the  
159 database, or a selected subset of TFs of interest. The query system also allows users to perform  
160 analyses based on the experimental type of validated TF-target interaction (e.g. TF-binding) or any  
161 other criteria in the metadata (e.g. TF-target assays performed in leaf vs. root). Queries can be built  
162 using the graphical *Query Builder* interface or by typing queries into the search text box. This makes  
163 the query system easy to use both for researchers new to the ConnecTF site, and for those who wish  
164 to build complex queries to parse multiple types of experimentally verified TF-target datasets for the  
165 TFs available in the database.

166  
167 ConnecTF includes several analysis and visualization tools for data integration (Figure 1), whose  
168 utility we demonstrate in three case studies. Once a query has been submitted and is processed, the  
169 *Summary* tab is loaded and gives an overview of the total number of validated TF-target genes for  
170 each experiment that was queried, grouped by individual TFs. The validated TF-target interactions  
171 are then made available in the *Table* tab, which provides an interactive table that can be downloaded  
172 for offline use in either Excel or CSV formats. The five remaining tabs in ConnecTF, allow users to  
173 analyze the queried data in various ways (Figure 1): 1) *Network* tab – provides access to TF-target  
174 network as JSON or SIF files or visualized using Cytoscape.js (Franz et al., 2015) (Figure 1A), 2)  
175 *Target List Enrichment* tab – displays the overlap between user-submitted gene list(s) and validated  
176 TF-targets bound and/or regulated by the queried TF(s) and calculates statistical enrichment 3) *Motif*  
177 *Enrichment* tab – performs statistical tests for cis-motif enrichment of TF-binding sites in the  
178 validated targets of queried TFs (Figure 1E), 4) *Gene Set Enrichment* tab – calculates the significance  
179 of overlap between the validated targets of each TF analysis, when compared pairwise (Figure 1C),  
180 and 5) *Sungear* tab –compares the overlaps between TF-targets from multiple gene lists, comparable  
181 to a Venn diagram, but better suited to analyzing more than three lists (Figure 1D) (Poultney et al.,  
182 2006). The *Network* tab also enables users to upload a predicted network and use validated TF-target  
183 datasets housed in the ConnecTF database to perform an automated precision/recall analysis. This  
184 function generates an area under precision recall (AUPR) curve with an interactive sliding-window  
185 feature that can be used to select a precision cutoff with which to prune/refine the predicted network  
186 (Figure 1B) (Marchive et al., 2013; Banf and Rhee, 2017). The three case studies below provide use  
187 examples for ConnecTF by combining each of these features.

### 188 189 ***Getting Started: Basic queries in ConnecTF.***

190 The most basic query in ConnecTF is to enter a TF name/symbol or Gene ID, which will return all of  
191 the experiments that validate TF-target gene interactions for that TF in the database. To demonstrate,  
192 we submitted a query for NLP7 (AT4G24020), a master regulator in the nitrogen signaling pathway,  
193 and the results returned from the ConnecTF database include seven experiments for NLP7: four  
194 ChIP-seq experiments performed in isolated root cells (Alvarez et al., 2020), one in vitro TF-target  
195 binding experiment using DAP-seq (O'Malley et al., 2016), one TF overexpression experiment that  
196 identifies direct regulated targets of NLP7 in isolated root cells (Alvarez et al., 2020), and one

197 experiment identifying NLP7-regulated targets based on analysis of an *nlp7* mutant in planta  
198 (Marchive et al., 2013). These results can be viewed in the *Table* tab on the ConnecTF site or  
199 downloaded as an Excel file (Supplemental Table 2), and list the validated NLP7 target genes from  
200 any one of these experiments. This list includes descriptions of the validated NLP7 target genes  
201 (where available) and other details such as edge count (e.g. number of experiments where an  
202 interaction between the TF and this target are validated), *P*-value and log2 fold change, if available.  
203

204 Determining the validated TF-target genes within a pathway or network of interest for one TF, or a  
205 set of TFs, is another common task that can be readily performed using ConnecTF. When a query is  
206 submitted in ConnecTF, the user can limit the target genes to one or more lists of genes using the  
207 *Target Gene List* box located below the *Query Builder*. We demonstrate this feature using the same  
208 NLP7 query as above, but in this example, from the *Target Gene List* box we select the predefined  
209 list of nitrogen response genes from shoot and root (Varala et al., 2018) named “Nitrogen\_by\_Time”.  
210 By selecting this list, the validated targets of NLP7 retrieved from the ConnecTF database are now  
211 restricted to the genes that are in one of these two pre-defined sets of genes (N-response in roots or  
212 shoots). In the results *Table* tab for this query, there are two additional columns that indicate each  
213 gene list (e.g. roots or shoots) to which the validated NLP7 targets belong (Supplemental Table 2).  
214 Uploading a *Target Gene List* also allows the user to determine the enrichment of gene targets of the  
215 TF in that pathway viewed in the *Target List Enrichment* tab.  
216

### 217 ***Case Study 1: Uncovering mechanisms of TF action and TF-TF interactions by integrating TF-*** 218 ***target binding, TF-regulation and cis-element datasets.***

219 In this case study, we demonstrate how to use the query functions and data housed in ConnecTF to  
220 integrate TF-target gene regulation and TF-binding data to elucidate TF mode-of-action, including its  
221 potential TF partners. In our previous study of 33 TFs, we showed that a single TF can either induce  
222 *or* repress target genes (Brooks et al., 2019). Moreover, we showed examples where direct TF-target  
223 binding (e.g. via cis-motif enrichment and DAP-seq binding) was associated with TF-mediated target  
224 gene induction, while indirect binding via TF partner(s) (e.g. only captured by ChIP) could account  
225 for TF-mediated repression of a target gene (Brooks et al., 2019). However, we were unable to  
226 generalize this discovery, as only 3/33 TFs in that study had both vitro and in vivo TF-binding data.  
227 To expand and generalize our discoveries of these distinct TF modes-of-action, we used ConnecTF to  
228 integrate TF-regulation data (Supplemental Table 3), and TF-binding data (Song et al., 2016) for 14  
229 TFs in the ABA signaling pathway. We did this by using functions in ConnecTF to integrate; i) the  
230 direct regulated TF targets of these 14 TFs identified in root cells (Supplemental Table 3) using the  
231 TARGET system (Bargmann et al., 2013; Brooks et al., 2019), ii) in planta TF-binding (e.g. ChIP-  
232 seq) (Song et al., 2016), iii) at least one cis-binding motif available on Cis-BP (Weirauch et al.,  
233 2014), and iv) validated in vitro TF-binding data obtained by DAP-seq (O'Malley et al., 2016) for  
234 5/14 of the ABA responsive TFs.  
235

236 *Validated targets of 14 TFs are specifically enriched in ABA-responsive genes*

237 First, we demonstrate how the validated TF-target gene datasets for these 14 ABA responsive TFs  
238 housed in the ConnecTF database can be integrated to understand how they regulate ABA signaling.  
239 To do this, we first used the *Target List Enrichment* tool in ConnecTF to determine for each of the 14  
240 TFs whether the validated TF-regulated target genes identified by controlled TF-nuclear import in  
241 root cells using the TARGET assay (Bargmann et al., 2013; Brooks et al., 2019) were significantly  
242 enriched in a list of ABA responsive genes identified in Song et al. (Song et al., 2016). This  
243 integrated analysis showed that the direct regulated targets of these 14 TFs are each significantly  
244 enriched for ABA responsive genes (Fisher's Exact test,  $P$ -value<0.05) (Figure 2, see Supplemental  
245 Data for query used to generate this figure). This analysis enabled us to address whether each of the  
246 14 TFs are involved in regulating genes that are induced or repressed in response to ABA (Figure 2).  
247 Moreover, this analysis revealed that two known regulators of ABA signaling, ABF1 and ABF3  
248 (Choi et al., 2000), are at the top of the list for having targets that are highly enriched for the ABA  
249 induced genes (Figure 2). Next, we further separated the TF-regulated targets of each of the 14 TFs  
250 into TF-induced or TF-repressed target sets using the *Query* function of ConnecTF. This analysis  
251 enabled us to determine the TF-target *specificity* (e.g. percent of TF-regulated targets that are ABA  
252 responsive), TF-target *influence* (e.g. percent of ABA responsive genes regulated by each TF), and  
253  $P$ -value of the overlap of TF-target genes with induced and repressed ABA responsive genes  
254 (Supplemental Table 4). This analysis revealed that for the majority of the 14 TFs, the TF-induced  
255 targets overlap significantly with genes induced by the ABA signal, while TF-repressed targets  
256 overlap significantly with the genes repressed by ABA treatment.

257  
258 *Distinct cis-motifs are enriched in the TF-induced vs. TF-repressed targets of 14 TFs in ABA*  
259 *signaling.*

260 We next sought to use the TF-target gene binding and TF-target gene regulation data for these 14 TFs  
261 to determine whether the TFs act alone, or in combination, to regulate the target genes in the ABA  
262 response pathway. To this end, we first asked whether the validated cis-binding motif for each TF  
263 (collected from Cis-BP) (Weirauch et al., 2014) showed specific enrichment in either the TF-induced  
264 or the TF-repressed target gene lists, as we found in a previous study of 33 TFs (Brooks et al., 2019).  
265 To do this, we first made a query in ConnecTF that returns the TF-induced or TF-repressed targets  
266 for each TF as separate gene lists. Next, we selected the *Individual Motifs* tab from within the *Motif*  
267 *Enrichment* results page. The default setting returns the cis-element enrichment in the 500 bp  
268 promoter region of the validated target genes of a TF for any cis-motif for that TF. Users can also  
269 define other genic regions of target genes (2000 bp promoter, 1000 bp promoter, 5' untranslated  
270 region (UTR), coding sequence (CDS), introns, 3' UTR and exons), or choose a cis-motif for another  
271 TF, e.g. a putative partner, and ConnecTF will calculate enrichment for the selected motif(s) in the  
272 selected genic region(s).

273  
274 For the 14 TFs in the ABA pathway, we examined their TF-induced vs TF-repressed gene target lists  
275 for enrichment of their own cis-motif and show examples for the TFs HB7, MYB3 and ZAT6,  
276 (Figure 3, see Supplemental Data for query used to generate this figure). We found that a majority of  
277 the 14 TFs tested have enrichment of their known cis-element in *either* their induced or repressed

278 targets that we identified as directly regulated TF-targets in root cells (Supplemental Table 5). Of  
279 these, 7/14 TFs (including HB7, Figure 3A) show enrichment of at least one known cis-motif for that  
280 TF exclusively in the TF-induced targets, while 2/14 (MYBR1 and MYB3, Figure 3B) show specific  
281 enrichment of cis-motif for that TF exclusively in the TF-repressed targets (Supplemental Table 5).  
282 For 5/14 TFs (including ZAT6, Figure 3C), there was no enrichment of their known cis-binding  
283 motif in either the TF-induced or TF-repressed targets.

284  
285 While cis-motif enrichment indicates where a TF is *likely* to directly bind in the genome, validated  
286 direct binding to specific genomic loci is available from in vitro TF-target gene binding (e.g. DAP-  
287 seq experiments) housed in the ConnecTF database (O'Malley et al., 2016). For the 5/14 ABA  
288 responsive TFs for which DAP-seq data is available (FBH3, GBF3, HB6, HB7, and MYBR1), our  
289 comparison of TF-induced or TF-repressed targets with in vitro TF-bound targets supported the cis-  
290 motif enrichment results. That is, for FBH3, HB7 and HB6, only the TF-induced target gene lists  
291 were enriched for genes that were bound in vitro to that TF, while for MYBR1, only TF-repressed  
292 targets were enriched in genes that were bound in vitro to that TF (Supplemental Table 6). GBF3,  
293 which had no cis-motif enrichment in either the TF-induced or TF-repressed directly regulated  
294 targets, also had no enrichment of TF-binding in vitro in either set of TF-regulated targets  
295 (Supplemental Table 6).

296  
297 *TF-regulated genes are largely TF-bound, while TF-bound genes are infrequently TF-regulated.*  
298 An outstanding question related to TF-target validation datasets, is when and whether TF-binding  
299 results in gene regulation. To answer this question, we asked whether genes that are bound by each of  
300 the 14 ABA responsive TFs in planta, based on CHIP-seq experiments (Song et al., 2016),  
301 significantly overlap with either TF-induced or TF-repressed genes identified in root cells  
302 (Supplemental Table 3). To do this, we used the *Gene Set Enrichment* tool in ConnecTF, which  
303 reports whether the pairwise overlap between any two queried experimental analyses is greater or  
304 less than expected by chance (Fisher's Exact test) (Figure 4D). This *Gene Set Enrichment* function is  
305 based on the Genesect tool in VirtualPlant (Katari et al., 2010) and described in Krouk et al. (Krouk  
306 et al., 2010). As an example, for three TFs - HB7, MYB3 and ZAT6 - the *Gene Set Enrichment*  
307 results show that both the TF-induced and TF-repressed target gene lists significantly overlap with  
308 the TF-bound targets of that TF ( $P$ -value<0.05, Fisher's exact test) (Figure 4, see Supplemental Data  
309 for query used to generate this figure). Extending this analysis to all 14 ABA responsive TFs, we find  
310 that 9/14 TFs have a significant overlap of TF-bound genes in planta with both the list of TF-induced  
311 and TF-repressed targets of that TF, as validated in root cells ( $P$ -value<0.05, Fisher's exact test)  
312 (Supplemental Table 7). For 4/14 of the TFs - ABF1, ABF3, DREB2A and HSFA6A - we found a  
313 significant overlap of the TF-bound targets only with the TF-induced targets ( $P$ -value<0.05, Fisher's  
314 exact test). By contrast, only 1/16 TFs (GBF2) had a significant overlap of TF-bound targets only  
315 with the list of TF-regulated targets that are repressed ( $P$ -value<0.05, Fisher's exact test)  
316 (Supplemental Table 7).

317



318 Finally, we used ConnectTF to evaluate the relationship of TF-binding vs. TF-regulation datasets.  
319 Overall, our integrated analysis of TF-binding and TF-regulation data showed that for 11/14 of the  
320 ABA responsive TFs, greater than 50%, and as much as 75%, of TF-target genes that were TF-  
321 regulated in root cells were also bound by that TF in planta (Figure 4D). By contrast, for all 14 TFs,  
322 the number of TF-bound targets in planta that were regulated by that TF never exceeded 25% (Figure  
323 4D).

324

325 *Identifying partner TF<sub>2</sub>-binding motifs in TF<sub>1</sub>-regulated genes.*

326 Next, for each set of TF<sub>1</sub>-regulated targets (either induced or repressed) that showed no enrichment  
327 of the known cis-binding motif for TF<sub>1</sub> (Supplemental Table 5), we used ConnectTF to search for  
328 overrepresentation of cis-motifs for potential partner TF<sub>2</sub>s in those sets of TF<sub>1</sub>-regulated genes.  
329 Rather than searching for all 1,310 cis-motifs available for Arabidopsis from CIS-BP (Weirauch et  
330 al., 2014), we limited our search to the 80 cis-motif clusters generated from all available Arabidopsis  
331 thaliana cis-motifs (Brooks et al., 2019), now housed in the ConnectTF database.

332

333 First, we performed cis-motif enrichment analysis on the validated target gene lists of three TFs -  
334 HB7, MYB3 and ZAT6 (Figure 5). For each of these TFs, we hypothesized that they could act  
335 directly on gene targets, or through a TF<sub>2</sub> partners, based on our analysis of TF-regulation, TF-  
336 binding and cis-motif enrichment. For HB7, while both HB7-induced and HB7-repressed targets  
337 identified in root cells are each bound by HB7 in planta (by ChIP-seq) (Figure 4A), the known HB7  
338 cis-motif is only enriched in the HB7-induced targets (Figure 3A). Using ConnectTF cis-analysis  
339 functions, we found that the HB7-repressed target gene list is enriched in a cis-motif (cis-cluster 13)  
340 for a WRKY TFs ( $P$ -value<0.05, Fisher's exact test) (Figure 5A). This finding suggests HB7-  
341 repression of gene targets is mediated by one or more TF<sub>2</sub> partners in the WRKY TF family. For  
342 MYB3, while both MYB3 induced and repressed target gene lists identified in root cells are each  
343 enriched in genes bound by MYB3 in planta (e.g. ChIP-seq) (Figure 4B), the MYB3 cis-motif is only  
344 enriched in the list of MYB3-repressed targets (Figure 3B). By contrast, the list of MYB3-induced  
345 targets are enriched in cis-motifs (cis-clusters 6, 39, 68) for TF<sub>2</sub>s in the bZIP/bHLH/BZR and  
346 CAMTA/FAR1 TF families ( $P$ -value<0.05, Fisher's exact test) (Figure 5B). This result suggests that  
347 MYB3 induces target genes via an indirect interaction with TF<sub>2</sub>(s) from the bZIP1/bHLH/BZR, or  
348 CAMTA/FAR1 families. Lastly, although the list of ZAT6-induced and ZAT6-repressed targets in  
349 root cells are enriched in genes bound by ZAT6 in planta (e.g. ChIP-seq) (Figure 4C), there is no  
350 enrichment of the known ZAT6 cis-element in either set of ZAT6-regulated genes (Figure 3C).  
351 Instead, the list of ZAT6 induced genes are enriched is cis-elements for cis-clusters 6 and 39 from the  
352 bZIP/bHLH/BZR TF families, while the list of ZAT6-repressed genes are enriched in cis-cluster 13  
353 for WRKY TFs ( $P$ -value<0.05, Fisher's exact test) (Figure 5C). This suggests that ZAT6 regulates  
354 both its induced and repressed targets via TF<sub>2</sub>(s) in these families.

355

356 When we analyzed all 14 TFs using this approach, we observed that cis-motif clusters 6 and 39 are  
357 enriched ( $P$ -value<0.05, Fisher's exact test) in the lists of TF-induced or TF-bound gene targets of  
358 7/14 of the ABA-responsive TFs (Supplemental Table 8). Furthermore, we found that cis-motif

359 Clusters 6 and 39 are enriched in the list of genes induced by ABA ( $P$ -value $<0.05$ , Fisher's exact  
360 test), but not in the list of ABA-repressed genes (Supplemental Table 8). This result suggests that  
361 partner TF<sub>2</sub>s from the bHLH/bZIP/BZR TF family/families work with MYB3, ZAT6, and other  
362 ABA-responsive TFs to regulate these ABA-responsive targets. Likewise, cis-motif cluster 13 which  
363 represents WRKY TFs, is enriched in the list of the TF-repressed or TF-bound targets of 7/14 TFs, as  
364 well as in the list of genes that are repressed in response to ABA ( $P$ -value $<0.05$ , Fisher's exact test)  
365 (Supplemental Table 8). Thus, these studies uncovered potential TF<sub>2</sub> partners of 14 TFs involved in  
366 the ABA response.

367  
368 ***Case Study 2: Refining/pruning inferred gene regulatory networks using validated TF-target data.***

369 In this case study, we show how ConnecTF can be used to readily evaluate the relevance of, and  
370 combine gold-standard TF-target gene validation data for refining network predictions using  
371 automated precision/recall analysis. This feature will advance the systems biology cycle of network  
372 prediction, validation, and refinement.

373  
374 ***Automated precision/recall analysis and refinement of a nitrogen response GRN***

375 As an example, we show how ConnecTF can automate a precision/recall analysis on a GRN inferred  
376 from time-series transcriptome data of the nitrogen response in Arabidopsis roots (Brooks et al.,  
377 2019). As a gold standard validation data, we selected the TF-target regulation data based on TF-  
378 perturbation experiments in root cells using the TARGET system (Bargmann et al., 2013). This set of  
379 55 TFs includes the 33 nitrogen response TFs from Brooks et al. (Brooks et al., 2019), 8 TFs from  
380 Alvarez et al. (Alvarez et al., 2020), and the 14 ABA response TF-target regulation datasets  
381 generated in root cells in this study (Supplemental Table 3). To initiate this precision/recall analysis  
382 of the inferred nitrogen response GRN in ConnecTF, we first queried the 55 TF-target gene  
383 regulation datasets performed in root cells using the *Query* page. To determine which of these 55 TFs  
384 were relevant to our GRN analysis, we used the *Target Network* box to select the "Root Predicted  
385 Nitrogen Network" from Brooks et al. (Brooks et al., 2019). This query returned a total of 32 TFs  
386 and 1,349 validated TF-target genes in the predicted nitrogen-regulatory network. This query  
387 automatically generates a precision/recall curve, which is seen in the AUPR section at the bottom  
388 half of the *Network* tab (Figure 6, see Supplemental Data for query used to generate this figure). The  
389 slider or textbox above the AUPR plot can be used to select a precision cutoff score, which will  
390 update the interactive AUPR graph and table with details of a pruned/refined network, e.g. the  
391 predicted TF-target edges whose score equals or exceeds the selected precision score threshold. In  
392 this example, the selected cutoff of 0.32 reduced the size of the predicted N-regulatory GRN from  
393 240,410 interactions between 145 TFs and 1,658 targets to a refined high-confidence GRN of 4,343  
394 interactions between 143 TFs and 215 target genes whose predicted interactions passed the threshold  
395 set by the precision/recall analysis of the validated TF-target gene interactions.

396  
397 GRNs constructed based on co-expression data can also be validated in a similar manner. To this  
398 end, we provide a precision/recall example for a GRN built from the co-expression network available  
399 in the Atted-II database (Obayashi et al., 2018). We pruned this co-expression GRN using all TF-

400 regulation data in the ConnecTF database (Supplemental Figure 2, see Supplemental Data for query  
401 used to generate this figure).

402

403 Using the appropriate buttons at the top of the *Network* page, the user can download the  
404 pruned/refined network as a network file (in JSON or SIF formats) or visualize the network in the  
405 browser (*Open Network*). The precision cutoff can be further modified while viewing the network in  
406 the browser using the slider or text box in the *Additional Edges* menu. Edges within the network can  
407 be hidden to highlight a specific interaction type of interest (e.g. time-based edge predictions) or  
408 additional edges can be added from a file the user uploads. The resulting pruned network can be  
409 saved as a JSON file or an image exported.

410

411 *TF-regulation data outperforms in vitro TF-binding as a gold-standard for precision/recall analysis*

412 Next, we demonstrate how ConnecTF can be used to evaluate which TF-target validation datasets are  
413 most effective for use as gold standards for network refinement. As an example, the automated  
414 functions in ConnecTF enabled us to rapidly evaluate and compare the relative AUPR performance  
415 of different TF-target validated datasets (e.g. TF-binding (DAP-seq) vs. TF-regulation) in  
416 precision/recall analysis of a GRN inferred from time-series nitrogen response in Arabidopsis roots  
417 (Brooks et al., 2019). The TF-target validated datasets we tested are; 1) TF-Regulated gene sets: TF-  
418 target sets regulated in root cells (e.g. TARGET assay) (Brooks et al., 2019; Alvarez et al., 2020), 2)  
419 TF-Bound gene sets: TF-target sets bound in vitro (DAP-seq) (O'Malley et al., 2016), or 3) TF-  
420 regulated and TF-bound gene sets: TF-target sets regulated in root cells (TARGET assay) and bound  
421 in vitro (DAP-seq) (Table 2). For the gene sets that involved TF-target binding (i.e. 2 and 3 above),  
422 we also used the DHS data (Sullivan et al., 2014) housed in the ConnecTF database to filter for  
423 DAP-seq peaks that occur in open chromatin regions in root tissue.

424

425 By comparing the precision/recall results on networks refined using these three validated TF-target  
426 gene datasets, we found that using TF-regulated target data identified in root cells as “gold standard”  
427 resulted in a higher AUPR, and greater improvement in AUPR relative to the randomized predicted  
428 network, compared to using in vitro TF-binding target data alone (DAP-Seq) (Table 2). Also, we  
429 found that combining TF-target regulated and TF-target bound datasets reduced the AUPR, however,  
430 it resulted in a greater improvement relative to the randomized network, compared to using TF-  
431 regulation datasets only. Finally, we found that applying the DHS filter to DAP-seq peaks reduced  
432 the AUPR, and had only a small effect on the improvement of the AUPR relative to the randomized  
433 network, compared to the same set of edges without the DHS filter (Table 2). Thus, the ability to test  
434 and combine TF-target datasets in an automated AUPR analysis enabled us to rapidly determine  
435 which datasets were most effective for use in network refinement.

436

437 *Case Study 3: Charting a network path by combining validated TF-target data for multiple TFs*

438 An important feature that distinguishes ConnecTF from most other available analysis tools/platforms  
439 concerning TFs, is its *Query* building function. The *Query* builder allows users to readily select,  
440 parse, and combine TF-target gene validation data from different TF experiments and research

441 groups. For example, below we demonstrate how ConnecTF can be used to chart a network path  
442 from the direct targets of a TF<sub>1</sub> to its indirect targets via secondary TFs (TF<sub>2</sub>s). We initially  
443 conceived of this Network Walking approach which we manually executed in Brooks et al. (Brooks  
444 et al., 2019). As an example, we show how ConnecTF can be used to chart a network path from TF<sub>1</sub> -  
445 NLP7, a master TF in the nitrogen signaling pathway – to its direct TF<sub>1</sub>-targets to its indirect targets,  
446 by combining TF-target regulation and TF-target binding datasets from two different NLP7 studies  
447 (Marchive et al., 2013; Alvarez et al., 2020).

448

#### 449 *Step 1. Identify direct vs. indirect targets of TF<sub>1</sub>*

450 The first step in charting a network path is to identify the direct vs. indirect targets of TF<sub>1</sub>. To this  
451 end, we used the *Query* function in ConnecTF to identify direct NLP7 (TF<sub>1</sub>) targets as genes that are  
452 both NLP7-regulated and NLP7-bound (Marchive et al., 2013; Alvarez et al., 2020). Next, we  
453 identified indirect NLP7 targets as genes that are regulated, but not bound by NLP7 in ChIP  
454 experiments (Marchive et al., 2013; Alvarez et al., 2020). We executed two simple queries in  
455 ConnecTF to produce these lists of direct targets of NLP7 (Figure 7A, Query 1, see Supplemental  
456 Data for details of Query 1) and indirect targets of NLP7 (Figure 7A, Query 2, see Supplemental  
457 Data for details of Query 2). The list of genes resulting from these queries can be saved within  
458 ConnecTF, to be used as direct vs. indirect target gene lists of the TF<sub>1</sub> (NLP7) for further analyses in  
459 the following steps, or downloaded by the user.

460

#### 461 *Step 2. Connect TF<sub>1</sub> to its indirect targets via its direct intermediate TF<sub>2</sub>s*

462 With the lists of direct vs. indirect targets of a TF<sub>1</sub> (NLP7), we can now perform the second step of  
463 charting a network path in the Network Walking approach. In Step 2, we used ConnecTF to connect  
464 the indirect targets of NLP7 via TF<sub>2</sub>s that are themselves direct targets of NLP7. To do this, we  
465 queried all the TF-target regulation datasets performed in root cells (55 TFs) in the ConnecTF  
466 database, restricting the results returned to the indirect targets of TF<sub>1</sub> (e.g. NLP7 regulated, but not  
467 bound) using the *Target Genes* filter on the query page. For this query, we also restricted the TF<sub>2</sub>s to  
468 the direct targets of NLP7, as identified in Step 1, using the *Filter TFs* option (Figure 7A, Query 3,  
469 see Supplemental Data for details of Query 3). The resulting *Table* tab shows the complete set of  
470 validated TF-target edges from 8 TF<sub>2</sub>s that are direct targets of NLP7 (e.g. TF<sub>2</sub>s: ASR3, NF-YA3,  
471 DREB2A, ZAT6, ERF060, HB6, LBD37 and LBD38) to NLP7 indirect targets. From the *Target*  
472 *Enrichment* tab, we see that all 8 TF<sub>2</sub>s are enriched for NLP7 indirect targets ( $P$ -value<0.05, Fisher's  
473 exact test), with NF-YA3, LBD37 and LBD38 being the most important based on TF-influence,  
474 target specificity and  $P$ -value of the overlap (Supplemental Figure 3, see Supplemental Data for  
475 query used to generate this figure).

476

#### 477 *Step 3. Visualizing the Network Path from TF<sub>1</sub> → direct TF<sub>2</sub>(s) → indirect targets of TF<sub>1</sub>:*

478 Finally, we can visualize the resulting Network path from TF<sub>1</sub> (NLP7) → 8 direct TF<sub>2</sub> targets →  
479 indirect TF<sub>1</sub> targets. We can do this in ConnecTF by going to the *Network* tab and clicking *Open*  
480 *Network* which will launch Cytoscape.js (Franz et al., 2015). Basic Cytoscape functionality is

481 available within ConnectTF for viewing and adding additional edges to the network (Figure 7B), or  
482 the network can be downloaded as a JSON file and further modified by the user.  
483  
484

## 485 **Discussion**

486 As the cost of Next-generation sequencing technologies declines and new methods are developed to  
487 identify/validate TF targets, computational tools to integrate the increasing amount and types of  
488 experimental data that relate TFs with their target genes are becoming increasingly important  
489 (Grossman, 2019). Enabling researchers not only to access these various types of TF-target validation  
490 datasets, but to perform analyses that integrates multiple datasets and multiple types of data, will  
491 further our understanding of the mechanisms by which TFs function alone and together in a GRN  
492 that affects a biological pathways of interest.

493  
494 To this end, we developed ConnecTF (<https://ConnecTF.org>) to facilitate these types of research  
495 questions in GRN analysis/validation. Moreover, we have designed ConnecTF to be accessible to  
496 biologists with a wide-range of computational skills. As a resource for the plant research community,  
497 we are hosting two versions of ConnecTF for Arabidopsis and maize, with a combined 4,577,488  
498 edges for 562 TFs (Table 1 and Supplemental Table 1). In our three case studies, we provide  
499 examples of how ConnecTF can enable an integrated analysis of TF-target gene interactions that lead  
500 to biological insights of TF modes-of-action, using GRNs involved in the ABA and nitrogen  
501 response pathways.

502  
503 The ConnecTF database was designed to specifically house large-scale datasets for TF-binding and  
504 TF-regulation. For Arabidopsis, the vast majority of data for TF-target binding is in vitro (387 TFs)  
505 (O'Malley et al., 2016), and a more limited set of large-scale TF-target binding datasets in vivo (26  
506 TFs) (See Table 1). The ConnecTF database houses the largest set of TF-target regulation data based  
507 on a high throughput TF-assay performed in isolated plant cells (58 TFs) (Varala et al., 2018; Brooks  
508 et al., 2019; Alvarez et al., 2020), which also includes new data on TF-target regulation for 14 TFs  
509 identified in this study (Table 1). The ConnecTF database also houses cis-motif data for 730  
510 Arabidopsis TFs (Weirauch et al., 2014). Finally, the database contains information on TF-TF protein  
511 interactions (Yazaki et al., 2016; Trigg et al., 2017), and the ability for users to filter in vitro TF-  
512 binding data for peaks occurring in open chromatin regions from different tissues identified using  
513 ATAC-seq (Lu et al., 2019) or DHS (Sullivan et al., 2014).

514  
515 In Case Study 1, we used ConnecTF to combine TF-target gene validation data for 14 TFs in the  
516 ABA signaling pathway for which we have datasets for TF-binding in vivo (14/14 TFs) (Song et al.,  
517 2016), TF-regulation in root cells (14/14 TFs) (Supplemental Table 3), TF-binding in vitro (DAP  
518 seq) (5/14 TFs) (O'Malley et al., 2016), and cis-motif data (14/14 TFs) (Weirauch et al., 2014). Our  
519 integrated analysis of this TF-regulation and TF-binding data using ConnecTF allowed us to discover  
520 that TF-regulation is a good indicator of TF-binding, but TF-binding is a poor indicator of TF-  
521 regulation. Specifically, up to 78% of the direct TF-regulated genes were TF-bound in planta (Figure  
522 4D and Supplemental Table 7). However, the reverse is not the case, as for these 14 TFs, at most  
523 24% of TF-targets bound in planta were TF-regulated in root cells (Figure 4D and Supplemental  
524 Table 7). While this could be due to the different systems used in this study, TF-binding is known to  
525 be a poor indicator of TF-regulation across many organisms, even when TF regulation and TF

526 binding are compared from the same tissue (Phuc Le et al., 2005; Bolduc et al., 2012; Arenhart et al.,  
527 2014), or even the same cell samples (Para et al., 2014).

528  
529 Using ConnecTF to readily intersect TF-bound and TF-regulated gene targets for a large number of  
530 TFs also allowed us to develop mode-of-action models for how TF binding might lead to induction  
531 or repression of target genes by the TF. For this analysis, we use the direct regulated TF-targets  
532 validated in a plant cell-based system comprising 58 TFs, including 14 TFs from this current study  
533 (Supplemental Table 3) and 44 TFs from our previous work (Varala et al., 2018; Brooks et al., 2019;  
534 Alvarez et al., 2020). Combined, these TF-target regulation datasets have shown that 57/58 TFs can  
535 act as both an inducer and repressor, depending on the target genes. The one exception is HSFA6A,  
536 which acted primarily as an inducer (127 genes), and down-regulated only two targets (Supplemental  
537 Table 3). We also observed that the known cis-binding motif for a TF is most often significantly  
538 enriched in either the induced or repressed targets of that TF (Figure 3 and Supplemental Table 5), as  
539 we saw previously for 11 TFs (Brooks et al., 2019). This broader finding indicates that direct binding  
540 of a TF to its targets most often has a specific effect on target gene expression (e.g. either induction  
541 or repression, depending on the TF). Importantly, our integrated data analysis showed that TF-TF  
542 interactions likely play a role in the “switch” of a TF from an activator or repressor, depending on the  
543 target gene (Figure 5), as described below.

544  
545 The simplest model for TF-target regulation is through direct interaction of a TF via DNA-binding to  
546 cis-regulatory regions in its target genes. However, it has been observed that cellular and genomic  
547 context, including TF-TF cooperativity, can play an essential role in how a TF controls target gene  
548 expression (Yáñez-Cuna et al., 2012; Para et al., 2014; Slattery et al., 2014; Alvarez et al., 2020; de  
549 Boer et al., 2020). Indeed, we found examples of regulation of TF-target gene expression in the  
550 absence of evidence for direct TF-binding (Figures 3-5, Supplemental Tables 5-7). In these cases, TF  
551 regulation of the target gene could occur by indirect TF<sub>1</sub> binding to a target via its association with  
552 partner TF<sub>2</sub>s, sometimes referred to as “tethering” (Stender et al., 2010). Previous studies have  
553 compared ChIP and DHS foot-printing to distinguish between direct and indirect TF-target binding  
554 (Gordân et al., 2009; Neph et al., 2012). In case study 1, we demonstrate that using ConnecTF to  
555 integrate TF-target binding and TF-target regulation data enabled us to discover that for a majority of  
556 the 14 TFs in the ABA signaling pathway, both their TF-induced and TF-repressed target gene sets  
557 overlap significantly with in planta bound targets (Figure 4 and Supplemental Table 7). This occurs  
558 even when evidence for direct TF-binding, in the form of cis-motif enrichment or in vitro TF-  
559 binding, is absent (Supplemental Tables 5 and 6). Moreover, we used ConnecTF to identify potential  
560 partner TF<sub>2</sub>s involved in the indirect target binding of TF<sub>1</sub>, by enrichment of cis-binding motif  
561 clusters for other TF families (Brooks et al., 2019) in the direct regulated targets of the TF<sub>1</sub>s (Figure  
562 5).

563  
564 To do this, we looked for cis-motifs enriched in sets of TF<sub>1</sub>-regulated targets that are likely indirectly  
565 bound, i.e. those that are TF<sub>1</sub>-regulated (induced or repressed) and lack enrichment of the cis-motif  
566 for that TF<sub>1</sub>, but are bound to the TF<sub>1</sub> in planta (e.g. by ChIP-seq) (Figure 5). For HB7, we found

567 evidence for direct TF-binding leading to activation, while indirect binding leads to repression of its  
568 targets (Figure 5A). For MYB3, direct binding leads to target gene repression, while indirect binding  
569 leads to activation (Figure 5B). For ZAT6, we only found evidence for indirect binding to either its  
570 induced targets or repressed targets (Figure 5C). For the induced targets of ZAT6 (Figure 5C), we  
571 identified the enrichment of cis-motif clusters containing a core G-box motif, known to be bound by  
572 bZIP and bHLH TFs (de Vetten and Ferl, 1994; Toledo-Ortiz et al., 2003). Validation of this  
573 predicted TF-TF interaction leading to induction of ZAT6 indirect targets via a TF<sub>1</sub>-TF<sub>2</sub> interaction  
574 comes from a known ZAT6 interaction with UPB1, an ABA-responsive bHLH TF (Trigg et al.,  
575 2017). This finding, uncovered using ConnecTF, suggests a simple explanation for how ZAT6 may  
576 induce target genes indirectly via a TF<sub>1</sub>-TF<sub>2</sub> interaction (e.g. ZAT6-UPB1 complexes) (Figure 5). By  
577 contrast, cis-element analysis of the repressed targets of ZAT6 and other TFs (e.g. HB7) reveals an  
578 enrichment of cis-motif cluster 13 (Figure 5 and Supplemental Table 8), a core W-box motif known  
579 to be bound by WRKY TFs (Rushton et al., 1995).

580  
581 A remaining question is how do 3/14 TFs tested in the ABA signaling pathway (ABF1, ABF3, and  
582 DREB2A) regulate target gene transcription without binding to those targets either directly or  
583 indirectly (Supplemental Tables 5 and 7)? These three TFs show no cis-enrichment in their repressed  
584 regulated targets of their own known cis-motif(s), nor do their TF-repressed target genes show  
585 enrichment of TF-bound targets in planta (Supplemental Tables 5 and 7). Other regulatory  
586 mechanisms for transcriptional control have been reported that do not involve TF binding, either  
587 direct or indirect, to target genes. This includes the destabilizing of transcriptional complexes by a  
588 TF, as seen for SPL9 repression of anthocyanin biosynthesis (Gou et al., 2011), and TFs sequestering  
589 components of a transcriptional activating complex (Nemie-Feyissa et al., 2014). While it is not  
590 possible to directly determine whether these types of mechanisms apply to the 14 TFs in ABA  
591 signaling used in our analysis, the results demonstrate how ConnecTF can be used to generate  
592 testable hypotheses by integrating TF-regulation and binding datasets.

593  
594 In case study 2, we demonstrate how ConnecTF can be used to readily compare a predicted GRN  
595 against a set of validated TF-target gold standard interactions. With the large amount of TF-target  
596 validation data being generated, many sophisticated methods are being developed that use machine  
597 learning to predict GRNs from TF-target regulation and binding datasets (Marbach et al., 2012; Banf  
598 and Rhee, 2017; Mochida et al., 2018). However, a major bottleneck to this effort is the limited  
599 availability of validated TF-target edges, along with a clear understanding of what types of  
600 experimentally validated TF-target interactions are most useful to use as a gold standard for  
601 benchmarking inferred networks (Marbach et al., 2012; Banf and Rhee, 2017). The automated  
602 precision/recall analysis features of ConnecTF will contribute to overcoming this systems biology  
603 bottle neck by providing a resource for users to readily select and rapidly test which gold standard  
604 validated TF-target interactions are most useful to refine/prune or train their predicted networks.

605  
606 We demonstrate how ConnecTF allows users to readily subset their gold standard validated TF-target  
607 edges based on specific criteria (e.g. edge type, *P*-value, fold change etc.), and compare how each



608 subset affects the precision/recall analyses used to prune/refine inferred networks using automated  
609 functions in ConnecTF. We have incorporated features into ConnecTF that facilitate this  
610 functionality, including the ability to perform automated precision/recall analysis of user-provided  
611 ranked lists of inferred TF-target interactions in GRNs (Figure 6). In case study 2, we used these  
612 automated precision/recall analysis features to determine that TF-target regulation datasets are  
613 superior as gold-standard data, compared to in vitro TF-binding datasets. Specifically, we show that  
614 TF-target regulation datasets generated for 55 TFs using the TARGET cell-based TF-perturbation  
615 system (Bargmann et al., 2013; Varala et al., 2018; Brooks et al., 2019; Alvarez et al., 2020), results  
616 in a higher AUPR and statistical improvement relative to randomized networks, compared to using  
617 TF-target binding data from in vitro assays (i.e. DAP-seq), even when the same set of TFs are used  
618 (Table 2). Furthermore, the inferred network pruned with TF-targets that were *both* TF-regulated and  
619 TF-bound also resulted in a lower AUPR, compared to using all regulated targets for those TFs  
620 (Table 2). These results are unsurprising given what we observed in case study 1, that is, in vitro  
621 binding is extensive in the genome, but often represents only a subset of TF-regulated targets (Figure  
622 4D). This is likely related to the observation that a majority of TF-binding in the genome does not  
623 result in gene regulation (Supplemental Table 6), and/or TF-TF interactions (i.e. indirect binding)  
624 which are not captured in this in vitro DNA binding assay.

625  
626 In case study 3, we show how the ConnecTF platform enables users to integrate validated TF-target  
627 interactions from multiple TF datasets into a unified network path within a GRN, facilitating systems  
628 biology studies. To demonstrate this, we used ConnecTF to chart a network path that defined how  
629 NLP7, a master regulator of nitrogen signaling (Marchive et al., 2013; Alvarez et al., 2020), controls  
630 downstream genes through intermediate TF<sub>2</sub>s, following the Network Walking approach (Brooks et  
631 al., 2019). To do this, we showed how simple queries in ConnecTF can identify specific sets of  
632 targets of a TF<sub>1</sub> (i.e. direct vs. indirect targets of TF<sub>1</sub>) and how these results can be combined with  
633 TF<sub>1</sub> direct TF<sub>2</sub> targets in an iterative process to chart network paths from TF<sub>1</sub> (NLP7) → direct TF<sub>2</sub>s  
634 → direct targets of TF<sub>2</sub>s, which include indirect targets of TF<sub>1</sub>. Using ConnecTF allowed us to  
635 identify eight direct TF<sub>2</sub> targets of NLP7 that are able to directly regulate 68% of NLP7 indirect  
636 targets (Figure 7). This network path shows that LBD37 and LBD39, which are known to be  
637 important in nitrogen uptake and assimilation in planta (Rubin et al., 2009), are the TF<sub>2</sub>s that are  
638 most influential on NLP7 indirect targets (Supplemental Figure 3). Thus, ConnecTF offers a way for  
639 users to identify the sequential action of TFs in a network path to regulate a pathway or set of genes  
640 of interest.

641  
642 These three case studies are just some examples of the many ways that ConnecTF will be able to  
643 facilitate genomics and systems biology research in the plant community. We will host and maintain  
644 databases for the plant species *Arabidopsis* and maize. However, as we built the ConnecTF  
645 framework with common software packages and a species-independent structure, it is possible for  
646 users to easily set up an instance for any species of interest, and/or add new features and analysis  
647 tools. We provide detailed instructions on how to build private and/or public versions of ConnecTF  
648 for users interested in creating a database with their own data, and encourage other researchers to do

649 so. As more TF-centric data is generated, we expect ConnecTF to be a powerful and easy to use tool  
650 to integrate validated interactions into transcriptional regulatory networks in plants and other species.

## 651 **Materials and Methods**

### 652 **Validation of regulated TF targets in isolated plant cells**

653 To identify the direct regulated targets of the 14 TFs in the ABA pathway that had both in planta  
654 ChIP (Song et al., 2016) and cis-binding motifs available (Weirauch et al., 2014), we expressed the  
655 TFs in isolated root cells using the TARGET system described in Brooks et al (Brooks et al., 2019)  
656 as follows. Arabidopsis Col-0 plants were grown in 1% w/v sucrose, 0.5 g per L MES, 0.5x MS basal  
657 salts (-CN), 2% agar, pH 5.7 for 10 days. Light conditions were 120  $\mu\text{mol m}^{-2}\text{s}^{-1}$  at constant  
658 temperature at 22°C, 16 h light, 8 h dark. Roots were harvested stirred with cellulase and  
659 macerozyme (Yakult, Japan) for 3 hours to remove the cell wall. Root protoplasts were filtered  
660 through 70  $\mu\text{m}$  and then 40  $\mu\text{m}$  cell strainers (BD Falcon, USA) and pelleted at 500 x g. Filtered root  
661 cells were washed with 15mL MMg buffer (400 mM mannitol, 10 mM  $\text{MgCl}_2$ , 4mM MES pH 5.7)  
662 and resuspended to between 2-3 x 10<sup>6</sup> cells per mL. Transfections of root cells were performed in a  
663 50 mL conical tube by mixing 1 mL of root cell suspension with 120  $\mu\text{g}$  of plasmid DNA, 1mL of  
664 PEG solution (40% polyethylene glycol 4000 (Millipore Sigma, USA), 400 mM mannitol, and 50  
665 mM  $\text{CaCl}_2$ ) and vortexed gently for 5 seconds. After mixing, 50 mL of W5 buffer (154 mM NaCl,  
666 125 mM  $\text{CaCl}_2$ , 5 mM KCl, 5 mM MES, 5 mM glucose, pH 5.7) was added to the tube. Root cells  
667 were pelleted at 1,200 x g, and washed 3 times with W5 buffer. Cells transfected with a single TF in  
668 the RFP vector (pBOB11, available at <https://gatewayvectors.vib.be/collection> (Bargmann et al.,  
669 2013)) and another batch of cells transfected with a single TF in the GFP vector (pBOB11-GFP,  
670 available at <https://gatewayvectors.vib.be/collection> (Brooks et al., 2019)) were aliquoted into 3  
671 replicate wells of a 24 well plate. The following day (18 hours) after TF expression and translation,  
672 transfected root protoplasts were treated with 35  $\mu\text{M}$  CHX for 20 min before a 10  $\mu\text{M}$  DEX treatment  
673 to induce TF nuclear import. Transfected root cells expressing the TF were sorted into GFP and RFP-  
674 expressing root cell populations by FACS 3 hours after DEX treatment.

675 To identify TF-regulated genes transcriptome analysis was performed. For this, cells expressing the  
676 candidate TF vs. EV were collected in triplicate and RNA-Seq libraries were prepared from their  
677 mRNA using the NEBNext® Ultra™ RNA Library Prep Kit for Illumina®. The RNA-Seq libraries  
678 were pooled and sequenced on the Illumina NextSeq 500 platform. The RNA-Seq reads were aligned  
679 to the TAIR10 genome assembly using HISAT2 (Kim et al., 2019) and gene expression estimated  
680 using the GenomicFeatures/GenomicAlignments packages (Lawrence et al., 2013). Gene counts were  
681 combined for each TF sample and the EV and differentially expressed genes in the TF transfected  
682 samples vs the EV samples were identified using the DESeq2 package (Love et al., 2014) with a  
683 TF+Batch model and an FDR adjusted p-value < 0.05. We filtered out genes that respond more than  
684 5-fold to CHX treatment in transfected protoplasts (Brooks et al., 2019) from the lists of TF targets.

685 Genes that are expressed in any of the protoplast experiments were used as the background for  
686 subsequent enrichment analyses in ConnecTF (Supplemental Table 9).

### 687 **TF-Target List Enrichment**

688 Target list enrichment calculates the significance of the overlap between TF-targets in each queried  
689 TF analysis and each user-uploaded gene list. The p-values are calculated using the Fisher's Exact  
690 Test adjusted with the Bonferroni correction. The background set of genes used for the calculation,  
691 which is by default all protein coding genes for both the Arabidopsis or maize instances of  
692 ConnecTF, can be manually set by the user by using the *Background Genes* option in the query page.

### 693 **Cis-motif Enrichment**

694 Arabidopsis and maize cis-binding motif PWMs were collected from Cis-BP (Weirauch et al., 2014)  
695 (Build 2.0) and the 80 cis-motif clusters from Brooks et al. (Brooks et al., 2019) and converted to  
696 MEME format. The FIMO (Grant et al., 2011) tool within the MEME (Bailey et al., 2009) package  
697 was used to identify every occurrence of each cis-binding motif in the nuclear genome (i.e. excluding  
698 mitochondrial and chloroplast chromosomes) at a p-value < 0.0001 using the base frequency in the  
699 nuclear genome as the background model.

700 We chose to remove overlapping sites for the same cis-binding motifs, which are particularly  
701 common for repetitive motifs. For each cis-binding motif, when two sites overlap, the match with the  
702 lowest p-value is kept, and the other is removed until only non-overlapping matches remain. The  
703 number of matches for each cis-binding motif is tallied for each individual gene region, subdivided  
704 into 2000, 1000, and 500 bp upstream of transcription start site, the 5' and 3' untranslated regions  
705 (UTRs), coding sequence (CDS), intron, exon and the full region transcribed into mRNA (cDNA). If  
706 a match is found to be within a region shared by more than one gene, it is counted for all the genes  
707 that it is associated with.

708 To calculate enrichment of a cis-binding motif or cis-motif cluster for a particular individual TF  
709 within a given region in a target gene of a queried analysis, the Fisher's Exact Test was used with a  
710 background of all individual cis-binding motifs or cis-motif clusters within that gene region,  
711 respectively. As in Target list enrichment, a user can upload a list of genes to use as the background,  
712 or use the default of all protein coding genes. The *P*-values are adjusted with the Bonferroni  
713 correction method.

714 If a Target Gene list (e.g. genes in a pathway of interest) is provided by the user, ConnecTF can also  
715 calculate the cis-binding motif enrichment for that gene list(s), separately. The p-values of motif  
716 enrichment on gene lists is adjusted with the Bonferroni correction as a group, independent of the  
717 correction performed on the queried analyses.

## 718 **Gene Set Enrichment**

719 The Gene set enrichment tool calculates the significance of overlap between all possible pairwise  
720 combinations of target gene lists identified for any TF-targets queried. Significance of overlap is  
721 calculated using the Fisher's exact test, using the default background of all protein coding genes, or  
722 the user uploaded background. Both the p-values for overlaps greater or equal to and lesser or equal  
723 to the one observed is calculated and displayed. All The p-values are then adjusted with the  
724 Bonferroni correction.

## 725 **Sungear**

726 Sungear (Poultney et al., 2006) is a tool to display/visual overlaps between gene lists resulting from  
727 different queries, similar to a Venn diagram or UpSet plot (Lex et al., 2014). The vertices on the  
728 outer polygon are anchor points, vertices, containing gene lists for each TF-analysis queried. Circular  
729 nodes within the polygon represents gene sets that are in common between the indicated analyses.  
730 Each node has one or more arrows pointing to the vertices corresponding to the analyses which  
731 contains the genes. The gene sets exclusively found in that node represents the specific combination  
732 of analyses. The position of the node is approximately the midway point between the combination of  
733 analyses it represents.

734 In our implementation of Sungear, we enhanced the graph by calculating a p-value which indicates  
735 whether a node contains greater or fewer genes than expected given the total number of targets  
736 regulated by each of the queried analyses. Calculation was performed using the following method:

737 Let's say there are  $n$  lists, each containing  $x_1, x_2 \dots x_n$  number of genes, with a total of  $x$  genes.

$$x = \sum_{i=1}^n x_i$$

738 If a node  $A_{1,2,4}$  indicates genes that are exclusively in common with lists 1, 2, and 4. Then the  
739 expectation value,  $e$ , of a gene being in that node can be calculated from multiplying probability of  
740 being in the gene list and not being in the gene list respectively and  $x$ .

$$741 \quad e_{A_{1,2,4}} = \left(\frac{x_1}{x}\right) \cdot \left(\frac{x_2}{x}\right) \cdot \left(\frac{x_4}{x}\right) \cdot \left(1 - \frac{x_3}{x}\right) \cdot \left(1 - \frac{x_5}{x}\right) \cdot \dots \cdot \left(1 - \frac{x_n}{x}\right) x .$$

742 This will be a binomial distribution, where success is defined as the number of genes in the node A,  
743 and the failure is the number of genes not in node A (total genes - number of genes in node A). The  
744 p-value is calculated for each node by comparing the observed value to the expected value using the  
745 binomial test and adjusted using the Bonferroni correction.

746 ***Code Availability***

747 The source code including instructions for setting up a public or private instance of ConnectTF is  
748 available at [https://github.com/coruzzilab/connectf\\_server](https://github.com/coruzzilab/connectf_server).

749 ***Data Availability***

750 All raw sequencing data from this project have been deposited in the Gene Expression Omnibus  
751 (GEO) database, <https://www.ncbi.nlm.nih.gov/geo> (accession no. GSE152405).

752 ***Acknowledgements***

753 We would like to acknowledge Reetu Tuteja for the contributions she made in the early stages of this  
754 project. We would like to thank Lauriebeth Leonelli for vital advice on the design of the site and for  
755 suggesting the name ConnectTF. Finally, we would like to thank Dennis Shasha, Carol Huang and  
756 members of the Coruzzi Lab for feedback throughout the development of ConnectTF, in particular  
757 Chia-Yi Cheng, Gil Eshel, and Joseph Swift. This work was supported by NIH Grant GM032877  
758 and NSF-PGRP: IOS-1339362 to G.C., NIH NIGMS Fellowship F32GM116347 to M.D.B., and  
759 a Plant Genomics Grant from the Zegar Family Foundation (A160051).

760  
761

**Tables**

| <b>Interaction Type</b>            | <b>Experiment Type</b> | <b>No. of TFs</b>                                    | <b># of edges</b> | <b>Reference</b>                                                                    |
|------------------------------------|------------------------|------------------------------------------------------|-------------------|-------------------------------------------------------------------------------------|
| TF-Binding                         | ChIP-seq               | 26                                                   | 257,400           | (Song et al., 2016)<br>(Birkenbihl et al., 2017)                                    |
|                                    | DAP-seq                | 382                                                  | 3,335,595         | (O'Malley et al., 2016)                                                             |
| TF-Regulation                      | in planta perturbation | 3                                                    | 7,894             | (Marchive et al., 2013)<br>(Varala et al., 2018)                                    |
|                                    | TARGET (plant cells)   | 58                                                   | 137,389           | (Brooks et al., 2019)<br>(Alvarez et al., 2020)<br>(Brooks et al., 2020 this study) |
| TF-TF protein-protein interactions | HaloTag-NAPPA CrY2H    | 1,221                                                | 6,555             | (Yazaki et al., 2016)<br>(Trigg et al., 2017)                                       |
| Cis-binding motifs                 | TF cis-binding motifs  | 1310 cis-motifs for 730 TFs collected from Cis-BP    |                   | (Weirauch et al., 2014)                                                             |
|                                    | Cis-motif clusters     | 80 clusters from 1,282 individual cis-binding motifs |                   | (Brooks et al., 2019)                                                               |

762 Table 1 – Overview of the validated Arabidopsis TF-target datasets in the ConnecTF database

| <b>Validated Edges Used</b>                                                       | <b>AUPR</b> | <b>AUPR randomized network</b> | <b>p-value</b> | <b>Percent improvement vs. random</b> |
|-----------------------------------------------------------------------------------|-------------|--------------------------------|----------------|---------------------------------------|
| TF-Regulated only (TARGET)                                                        | 0.2025      | 0.1595                         | <0.001         | 27%                                   |
| TF- bound only (in vitro) (DAP-seq)                                               | 0.3257      | 0.2967                         | <0.001         | 10%                                   |
| TF-Regulated and TF- bound (in vitro) (TARGET $\cap$ DAP-seq)                     | 0.0863      | 0.0614                         | <0.001         | 41%                                   |
| TF-bound only (in vitro) (DAP-seq)/ DHS filtered (root)                           | 0.1908      | 0.1682                         | <0.001         | 13%                                   |
| TF-Regulated and TF-bound (in vitro)/ DHS filtered (root) (TARGET $\cap$ DAP-seq) | 0.0555      | 0.0398                         | <0.001         | 39%                                   |

763 Table 2 – Precision/recall analysis of a GRN inferred network from time-series nitrogen response  
764 data in Arabidopsis roots (Brooks et al., 2019) performed using automated precision/recall functions  
765 in ConnecTF using different sets of experimentally validated edges in the ConnecTF database.

766 **Figures and Figure Legends**

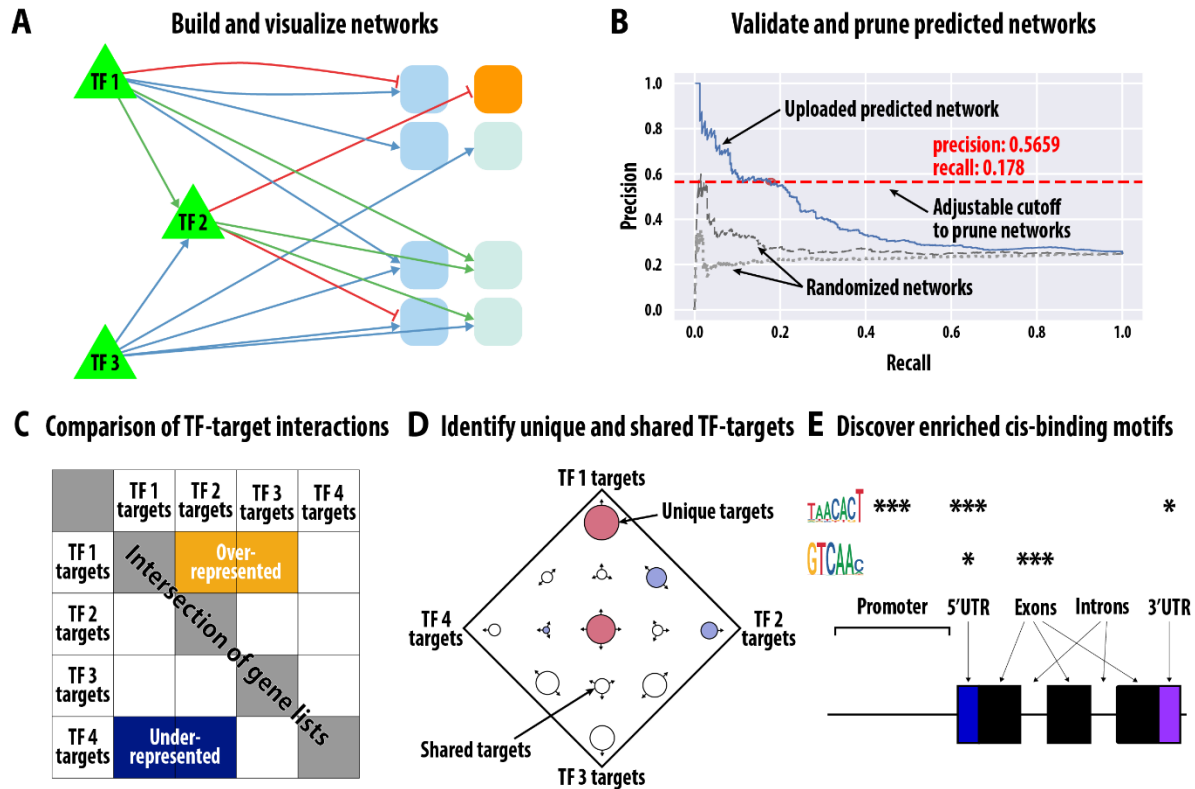

767  
 768 **Figure 1 – Analysis and visualization tools in ConnectTF for the integration of data supporting**  
 769 **TF-target gene interactions to build/validate gene regulatory networks.** ConnectTF contains TF-  
 770 target interactions for 707 experiments from Arabidopsis and 158 experiments in maize for a total of  
 771 4.58 million TF-target interactions for 590 TFs (Table 1 and Supplemental Table 1). The distinct  
 772 types of validated TF-target data within each species can be filtered and integrated using  
 773 analysis/visualization tools within ConnectTF to; A) build and visualize validated gene regulatory  
 774 networks, B) use validated TF-target data to perform precision/recall analysis and prune predicted  
 775 networks (user uploaded or predefined in database), C) compare whether the TF-targets in common  
 776 between two experiments/TFs are over-represented or under-represented, D) determine how TF-  
 777 targets are distributed between TF experiments, and E) identify enriched cis-binding motifs in  
 778 validated TF targets.



| Gene ID (TF Name) (# Targets)            | ABA Responsive (2537) <sup>▲</sup> | ABA Induced (1211) <sup>◆</sup> | ABA Repressed (597) <sup>◆</sup> |
|------------------------------------------|------------------------------------|---------------------------------|----------------------------------|
| <a href="#">AT4G34000 (ABF3) (736)</a>   | 6.24e-96 (313)                     | 9.40e-114 (239)                 | 6.83e-1 (32)                     |
| <a href="#">AT1G49720 (ABF1) (303)</a>   | 2.05e-62 (158)                     | 5.60e-83 (135)                  | 1.00e+0 (8)                      |
| <a href="#">AT2G22430 (HB6) (2566)</a>   | 9.65e-60 (597)                     | 2.14e-22 (274)                  | 5.64e-21 (162)                   |
| <a href="#">AT5G04760 (DIV2) (3986)</a>  | 6.72e-46 (777)                     | 2.05e-18 (364)                  | 1.14e-16 (205)                   |
| <a href="#">AT1G51140 (FBH3) (2410)</a>  | 7.62e-38 (512)                     | 7.84e-9 (215)                   | 2.77e-29 (173)                   |
| <a href="#">AT5G67300 (MYBR1) (1760)</a> | 7.48e-37 (404)                     | 5.25e-19 (201)                  | 8.51e-11 (104)                   |
| <a href="#">AT1G22640 (MYB3) (1313)</a>  | 3.48e-32 (316)                     | 2.08e-19 (165)                  | 2.90e-5 (70)                     |
| <a href="#">AT2G46680 (HB7) (1263)</a>   | 2.88e-31 (305)                     | 3.74e-17 (155)                  | 3.86e-11 (84)                    |
| <a href="#">AT4G37790 (HAT22) (2395)</a> | 1.01e-25 (470)                     | 5.69e-14 (234)                  | 9.29e-5 (108)                    |
| <a href="#">AT5G05410 (DREB2A) (856)</a> | 8.17e-21 (207)                     | 2.19e-18 (122)                  | 2.33e-4 (49)                     |
| <a href="#">AT4G01120 (GBF2) (3752)</a>  | 5.85e-15 (619)                     | 7.05e-6 (291)                   | 1.11e-4 (154)                    |
| <a href="#">AT2G46270 (GBF3) (470)</a>   | 3.17e-10 (111)                     | 1.27e-1 (43)                    | 1.90e-8 (41)                     |
| <a href="#">AT5G04340 (ZAT6) (2819)</a>  | 2.01e-2 (404)                      | 7.28e-1 (192)                   | 4.72e-1 (102)                    |
| <a href="#">AT5G43840 (HSFA6A) (129)</a> | 3.98e-2 (29)                       | 1.00e+0 (12)                    | 1.00e+0 (6)                      |

779

780 **Figure 2 – Case Study 1: Ranking significance of 14 TFs in regulation of ABA responsive genes.**

781 ConnectTF was used to address whether the direct regulated targets of 14 ABA responsive TFs  
782 identified in isolated root cells using the TARGET assay (Supplemental Table 3) are enriched for  
783 ABA responsive genes identified in Song et al. (Song et al., 2016). This screenshot from the  
784 ConnectTF website shows the results of the *Target List Enrichment* tool. We observed that the  
785 validated regulated targets of each of the 14 TFs are enriched for ABA responsive genes, including  
786 either ABA induced genes or ABA repressed genes ( $P$ -value < 0.05, Fisher's exact test). Known  
787 ABA regulators ABF1 and ABF3 (Choi et al., 2000) are among the most enriched and are primarily  
788 involved in regulating targets that are induced in response to ABA treatment.

| A               | A — AT2G46680 (HB7)<br>Induced     | B — AT2G46680 (HB7)<br>Repressed   |
|-----------------|------------------------------------|------------------------------------|
|                 | Add/Remove Motifs                  |                                    |
|                 | HB7_Homeodomain_DAP<br>(p-value) ⇕ | HB7_Homeodomain_DAP<br>(p-value) ⇕ |
| 500bp_promoter  | 3.55496e-8                         | 1.00000e+0                         |
| five_prime_UTR  | 2.84742e-5                         | 1.00000e+0                         |
| CDS             | 1.00000e+0                         | 1.00000e+0                         |
| intron          | 6.14324e-3                         | 1.00000e+0                         |
| three_prime_UTR | 1.00000e+0                         | 1.00000e+0                         |
| B               | C — AT1G22640 (MYB3)<br>Induced    | D — AT1G22640 (MYB3)<br>Repressed  |
|                 |                                    |                                    |
|                 | MYB3_MYB-SANT_PBM<br>(p-value) ⇕   | MYB3_MYB-SANT_PBM<br>(p-value) ⇕   |
| 500bp_promoter  | 1.00000e+0                         | 1.90443e-6                         |
| five_prime_UTR  | 1.00000e+0                         | 3.19122e-11                        |
| CDS             | 1.00000e+0                         | 1.00000e+0                         |
| intron          | 1.00000e+0                         | 8.92542e-2                         |
| three_prime_UTR | 1.00000e+0                         | 9.73686e-1                         |
| C               | E — AT5G04340 (ZAT6)<br>Induced    | F — AT5G04340 (ZAT6)<br>Repressed  |
|                 |                                    |                                    |
|                 | ZAT6_C2H2-ZF_PBM<br>(p-value) ⇕    | ZAT6_C2H2-ZF_PBM<br>(p-value) ⇕    |
| 500bp_promoter  | 1.00000e+0                         | 1.00000e+0                         |
| five_prime_UTR  | 1.00000e+0                         | 1.00000e+0                         |
| CDS             | 9.48507e-2                         | 5.00813e-1                         |
| intron          | 4.82672e-1                         | 1.00000e+0                         |
| three_prime_UTR | 1.00000e+0                         | 1.00000e+0                         |

789  
 790 **Figure 3 – Case Study 1: Known cis-binding motifs for a TF are enriched in specific subsets of**  
 791 **TF-regulated genes (induced vs. repressed).** The ConnectTF database houses 1,310 experimentally  
 792 determined cis-binding motifs for 730 Arabidopsis TFs and 37 cis-binding motifs for 26 maize TFs  
 793 (Table 1 and Supplemental Table 1). Users can use this resource determine if any of these cis-motifs  
 794 are enriched in the targets of the queried TF(s) using the *Individual Motifs* section of the *Motif*  
 795 *Enrichment* tab. Here, we present a screenshot demonstrating how ConnectTF can be used to  
 796 determine the enrichment of cis-motifs within the subset of targets of a TF (e.g. TF-induced or TF-  
 797 repressed targets). The results show that the A) the HB7 cis-motif is enriched only in the TF-targets  
 798 induced by HB7 in a root cell-based TF-assay, but not in the targets whose expression is repressed by  
 799 HB7, B) the MYB3 cis-motif is enriched only in the TF-targets repressed by MYB3, but not the  
 800 MYB3-induced targets, and C) the known motif for ZAT6 is not found to be enriched in either the  
 801 induced or repressed targets of ZAT6. *P*-values were calculated using the Fisher’s exact test.

802

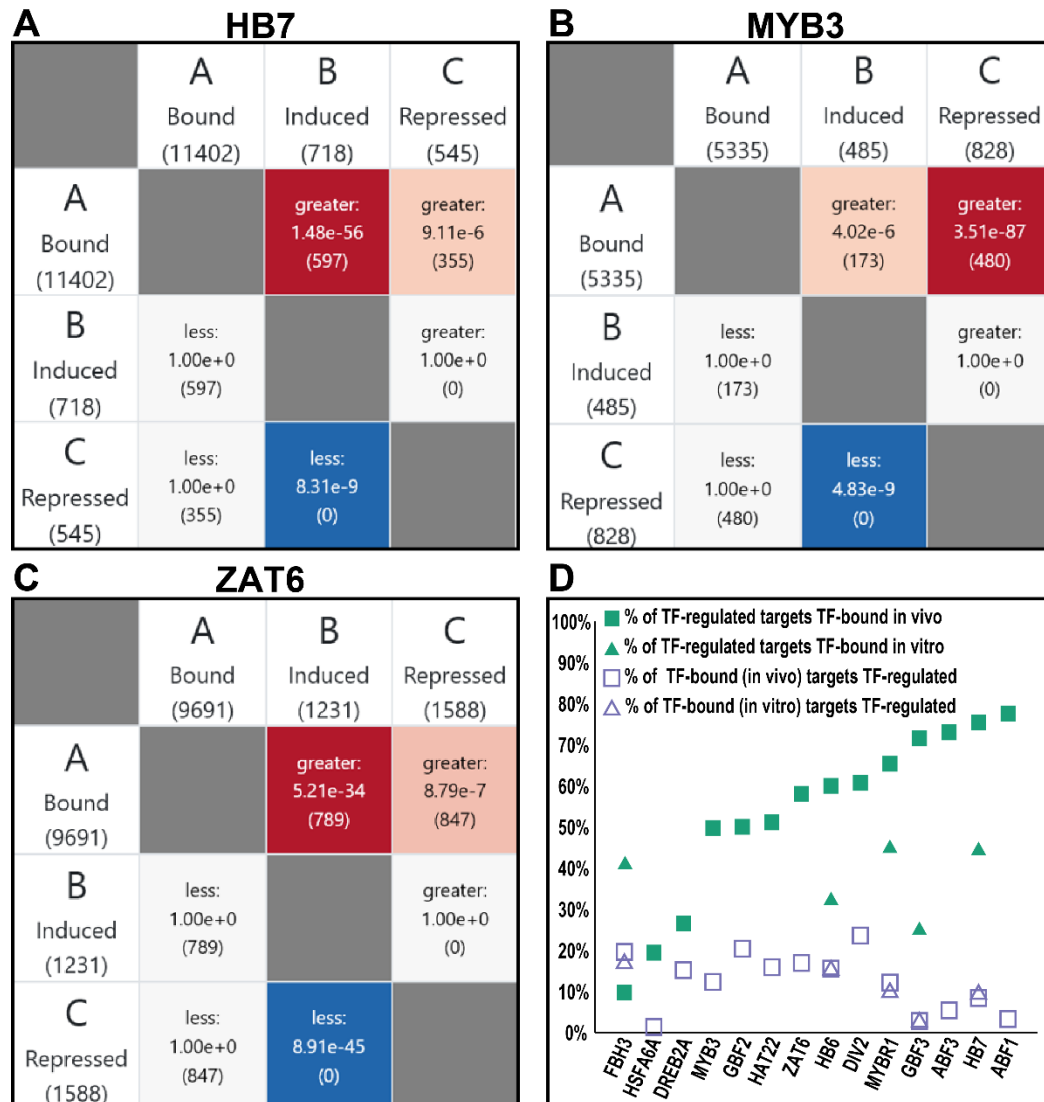

803  
 804 **Figure 4 – Case Study 1: TF-regulated gene targets are largely TF-bound, while TF-bound**  
 805 **genes are infrequently TF-regulated.** The *Gene Set Enrichment* tool in *ConnecTF* can be used to  
 806 determine if the pairwise overlap of the target gene lists of two TF analyses is significant (Fisher’s  
 807 exact test). This feature enables users to answer common questions such as “What is the overlap  
 808 between ChIP and TF perturbation of the same TF? Or, how significant is the overlap of the targets  
 809 of two different TFs?” To demonstrate this feature, for A) HB7, B) MYB3 and C) ZAT6, we show  
 810 screenshots from the *ConnecTF* site of the overlap between bound targets as determined by in planta  
 811 ChIP (Song et al., 2016) and the induced and repressed TF-targets that we determined in isolated root  
 812 cells in this study using the TARGET assay. For each TF, the bound targets significantly overlap  
 813 with both the TF-induced and TF-repressed targets identified in cells. D) When we performed this  
 814 overlap of TF-regulation and TF-binding for all 14 TFs (Supplemental Tables 6 and 7), we observed  
 815 that the percent of TF-regulated genes that are TF bound is much greater than the percent of TF-  
 816 bound genes that are TF-regulated, regardless of whether the binding data is in vivo or in vitro. This  
 817 suggests that TF-binding is a poor indicator of gene regulation in the absence of complimentary TF-  
 818 regulation data for each TF.

|   | TF <sub>1</sub> | TF <sub>1</sub> Target Set | Enrichment of TF <sub>1</sub> cis-motif | Enrichment of TF partner cis-motifs clusters |                                     |                            | Model for TF <sub>1</sub> -target regulation                                        |
|---|-----------------|----------------------------|-----------------------------------------|----------------------------------------------|-------------------------------------|----------------------------|-------------------------------------------------------------------------------------|
|   |                 |                            |                                         | Cis-cluster #                                | TF <sub>2</sub> family              | P-value                    |                                                                                     |
| A | HB7             | Induced & Bound            | 3.6e-8                                  | -                                            | -                                   | -                          | 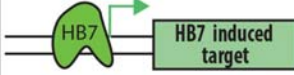 |
|   |                 | Repressed & Bound          | No Enrichment                           | 13                                           | WRKY                                | 7.7e-7                     |  |
| B | MYB3            | Induced & Bound            | No Enrichment                           | 6<br>39<br>43                                | bZIP/bHLH/BZR<br>bHLH<br>CAMTA/FAR1 | 9.0e-5<br>1.6e-4<br>3.5e-3 |  |
|   |                 | Repressed & Bound          | 1.9e-6                                  | -                                            | -                                   | -                          |  |
| C | ZAT6            | Induced & Bound            | No Enrichment                           | 6<br>39                                      | bZIP/bHLH/BZR<br>bHLH               | 4.7e-6<br>1.2e-6           |  |
|   |                 | Repressed & Bound          | No Enrichment                           | 13                                           | WRKY                                | 1.9e-7                     |  |

819

820

821

822

823

824

825

826

827

828

829

830

831

832

**Figure 5 – Case Study 1: Putative cis-motifs for TF<sub>2</sub> partners are identified in indirectly bound TF<sub>1</sub>-targets.** ConnecTF was used to combine the new TF-regulation data generated in this study for 14 ABA responsive TFs with existing TF-binding data in planta (Song et al., 2016), and to reveal mode-of-action for how these TFs function to regulate target genes in the ABA signaling pathway. Here we summarize these results for 3/14 TFs; A) HB7, B) MYB3, and C) ZAT6. For both HB7 and ZAT6, we found that TF-repressed and TF-bound targets, which lack enrichment of the known cis-motif for that TF (see Figure 3), had enrichment of the cis-motif cluster representing WRKY TFs (Brooks et al., 2019). Similarly, for MYB3 and ZAT6, the TF-induced and TF-bound targets that were not enriched in the cis-motif for these TFs, were each enriched for cis-motif clusters 6 and 39 which represents the bZIP/bHLH/BZR families of TFs (Brooks et al., 2019). This cis-analysis allowed us to derive a model for each TF (e.g. HB7, MYB3 and ZAT6) which describes how physical interactions with putative partner TFs (TF<sub>2</sub>s) enable the TF to regulate subsets of its target genes, even in the absence of direct binding.

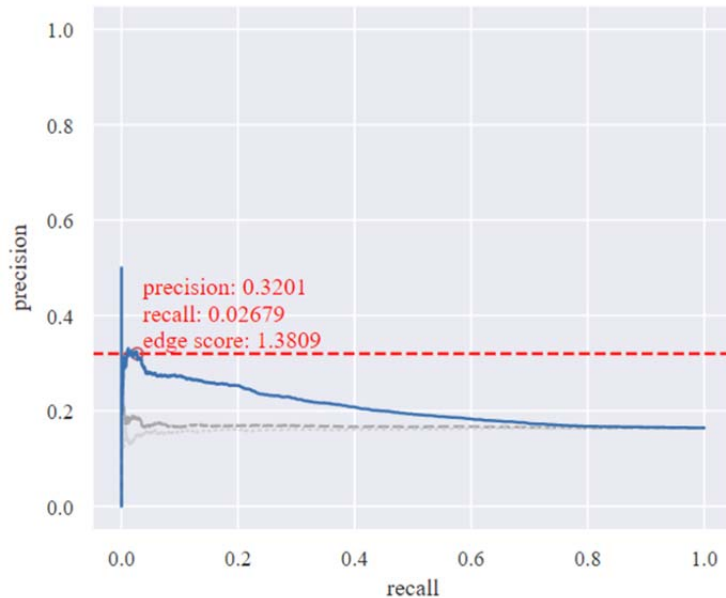

|                      |               |
|----------------------|---------------|
| AUPR                 | 0.2070        |
| AUPR Random          | 0.1645        |
| p-value              | <0.001        |
| Precision Threshold  | 0.32          |
| Edge Score Threshold | 1.3809        |
| Number of edges      | 4,343/240,410 |
| Number of TFs        | 143/145       |
| Number of Targets    | 215/1,658     |

833  
834 **Figure 6 – Case Study 2: Performing an automated precision/recall analysis on an inferred**  
835 **network uploaded by the user.** Users are able to perform an automated precision/recall analysis on  
836 a predicted network. To do this, the user first uploads a ranked list of TF-target interactions in a  
837 predicted networks into ConnectTF from the *Query* page using the *Target Network* box. Next, they  
838 can validate the predicted network using TF-target gene validated data in the ConnectTF database.  
839 Once they do this, within the *Network* tab, a precision/recall analysis (AUPR) section will be  
840 automatically generated for the predicted network, using selected TF-target validation datasets in the  
841 ConnectTF database, and display a precision/recall plot and summary table. The user can then select a  
842 precision cutoff using the sliding bar above the plot, which will interactively update the AUPR graph,  
843 summary table, and the network that is visualized or exported. Query filters enable the user to select  
844 which TFs and the specific types of edges that should be used as the “gold standard” to perform  
845 precision/recall analysis of the predicted network. Here we show a screenshot for an example where  
846 we used the time-based inferred network from Arabidopsis roots (Brooks et al., 2019), and all  
847 validated edges from TFs whose TF-regulated targets were identified in root cells (39 experiments)  
848 to demonstrate this AUPR feature of ConnectTF.

849

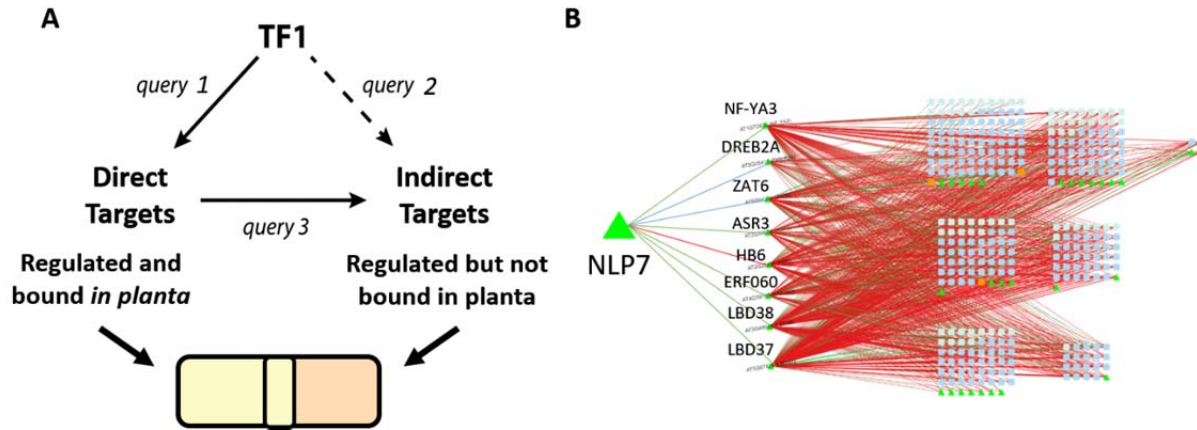

850

851 **Figure 7 – Case Study 3: Network Walking: Using ConnectTF to chart a network path from**  
852 **TF<sub>1</sub> → TF<sub>2</sub>s → indirect targets of TF<sub>1</sub>.** The query system of ConnectTF can be used in an iterative  
853 process, with the results of one query being used to filter the TFs and/or target genes of other queries.  
854 This facilitates the building of more complex GRNs, such as charting a network path from TF<sub>1</sub> to its  
855 downstream TF<sub>2</sub>s and indirect targets. A) ConnectTF can be used to chart a network path from a TF<sub>1</sub>  
856 via its direct TF<sub>2</sub>s to its indirect targets using the Network Walking approach described in Brooks et  
857 al. (Brooks et al 2019). Simple queries can be used in ConnectTF to integrate TF-target binding and  
858 TF-target regulation datasets to identify TF<sub>1</sub> direct targets (TF<sub>1</sub>-regulated and TF<sub>1</sub>-bound, query 1)  
859 and TF<sub>1</sub> indirect targets (TF<sub>1</sub>-regulated but not TF<sub>1</sub>-bound, query 2). The results of a query can also  
860 be saved and used to filter subsequent user queries, as in query 3. B) We demonstrate the process of  
861 Network walking using NLP7, a master TF<sub>1</sub> involved in nitrogen signaling, identifying a set of 8  
862 direct intermediate TF<sub>2</sub>s targets acting downstream of NLP7 that control 68% of the NLP7 indirect  
863 targets.

864

## Parsed Citations

**Alvarez JM, Schinke AL, Brooks MD, Pasquino A, Leonelli L, Varala K, Safi A, Krouk G, Krapp A, Coruzzi GM (2020) Transient genome-wide interactions of the master transcription factor NLP7 initiate a rapid nitrogen-response cascade. *Nat Commun* 11: 1157**

Pubmed: [Author and Title](#)

Google Scholar: [Author Only](#) [Title Only](#) [Author and Title](#)

**Arenhart RA, Bai Y, Valter de Oliveira LF, Bucker Neto L, Schunemann M, Maraschin FdS, Mariath J, Silverio A, Sachetto-Martins G, Margis R, Wang Z-Y, Margis-Pinheiro M (2014) New Insights into Aluminum Tolerance in Rice: The ASR5 Protein Binds the STAR1 Promoter and Other Aluminum-Responsive Genes. *Molecular Plant* 7: 709-721**

Pubmed: [Author and Title](#)

Google Scholar: [Author Only](#) [Title Only](#) [Author and Title](#)

**Bailey TL, Boden M, Buske FA, Frith M, Grant CE, Clementi L, Ren J, Li WW, Noble WS (2009) MEME SUITE: tools for motif discovery and searching. *Nucleic Acids Res* 37: W202-208**

Pubmed: [Author and Title](#)

Google Scholar: [Author Only](#) [Title Only](#) [Author and Title](#)

**Banf M, Rhee SY (2017) Computational inference of gene regulatory networks: Approaches, limitations and opportunities. *Biochimica et Biophysica Acta (BBA) - Gene Regulatory Mechanisms* 1860: 41-52**

Pubmed: [Author and Title](#)

Google Scholar: [Author Only](#) [Title Only](#) [Author and Title](#)

**Bargmann BO, Marshall-Colon A, Efroni I, Ruffel S, Birnbaum KD, Coruzzi GM, Krouk G (2013) TARGET: a transient transformation system for genome-wide transcription factor target discovery. *Mol Plant* 6: 978-980**

Pubmed: [Author and Title](#)

Google Scholar: [Author Only](#) [Title Only](#) [Author and Title](#)

**Birkenbihl RP, Kracher B, Roccaro M, Somssich IE (2017) Induced Genome-Wide Binding of Three Arabidopsis WRKY Transcription Factors during Early MAMP-Triggered Immunity. *The Plant Cell* 29: 20-38**

Pubmed: [Author and Title](#)

Google Scholar: [Author Only](#) [Title Only](#) [Author and Title](#)

**Bolduc N, Yilmaz A, Mejia-Guerra MK, Morohashi K, O'Connor D, Grotewold E, Hake S (2012) Unraveling the KNOTTED1 regulatory network in maize meristems. *Genes & Development* 26: 1685-1690**

Pubmed: [Author and Title](#)

Google Scholar: [Author Only](#) [Title Only](#) [Author and Title](#)

**Brooks MD, Cirrone J, Pasquino AV, Alvarez JM, Swift J, Mittal S, Juang C-L, Varala K, Gutiérrez RA, Krouk G, Shasha D, Coruzzi GM (2019) Network Walking charts transcriptional dynamics of nitrogen signaling by integrating validated and predicted genome-wide interactions. *Nature Communications* 10: 1569**

Pubmed: [Author and Title](#)

Google Scholar: [Author Only](#) [Title Only](#) [Author and Title](#)

**Chatterjee S, Ahituv N (2017) Gene Regulatory Elements, Major Drivers of Human Disease. *Annual Review of Genomics and Human Genetics* 18: 45-63**

Pubmed: [Author and Title](#)

Google Scholar: [Author Only](#) [Title Only](#) [Author and Title](#)

**Choi H-i, Hong J-h, Ha J-o, Kang J-y, Kim SY (2000) ABFs, a Family of ABA-responsive Element Binding Factors. *Journal of Biological Chemistry* 275: 1723-1730**

Pubmed: [Author and Title](#)

Google Scholar: [Author Only](#) [Title Only](#) [Author and Title](#)

**Cirrone J, Brooks MD, Bonneau R, Coruzzi GM, Shasha DE (2020) OutPredict: multiple datasets can improve prediction of expression and inference of causality. *Scientific Reports* 10: 6804**

Pubmed: [Author and Title](#)

Google Scholar: [Author Only](#) [Title Only](#) [Author and Title](#)

**de Boer CG, Vaishnav ED, Sadeh R, Abeyta EL, Friedman N, Regev A (2020) Deciphering eukaryotic gene-regulatory logic with 100 million random promoters. *Nature Biotechnology* 38: 56-65**

Pubmed: [Author and Title](#)

Google Scholar: [Author Only](#) [Title Only](#) [Author and Title](#)

**de Vetten NC, Ferl RJ (1994) Transcriptional regulation of environmentally inducible genes in plants by an evolutionary conserved family of G-box binding factors. *Int J Biochem* 26: 1055-1068**

Pubmed: [Author and Title](#)

Google Scholar: [Author Only](#) [Title Only](#) [Author and Title](#)

**Eveland AL, Goldshmidt A, Pautler M, Morohashi K, Liseron-Monfils C, Lewis MW, Kumari S, Hiraga S, Yang F, Unger-Wallace E, Olson A, Hake S, Vollbrecht E, Grotewold E, Ware D, Jackson D (2014) Regulatory modules controlling maize inflorescence architecture. *Genome Res* 24: 431-443**

Pubmed: [Author and Title](#)

Google Scholar: [Author Only](#) [Title Only](#) [Author and Title](#)

**Franz M, Lopes CT, Huck G, Dong Y, Sumer O, Bader GD (2015) Cytoscape.js: a graph theory library for visualisation and analysis. *Bioinformatics* 32: 309-311**

Pubmed: [Author and Title](#)

Google Scholar: [Author Only Title Only Author and Title](#)

**Gordân R, Hartemink AJ, Bulyk ML (2009) Distinguishing direct versus indirect transcription factor–DNA interactions. *Genome Research* 19: 2090-2100**

Pubmed: [Author and Title](#)

Google Scholar: [Author Only Title Only Author and Title](#)

**Gou J-Y, Felippes FF, Liu C-J, Weigel D, Wang J-W (2011) Negative Regulation of Anthocyanin Biosynthesis in *Arabidopsis* by a miR156-Targeted SPL Transcription Factor. *The Plant Cell* 23: 1512-1522**

Pubmed: [Author and Title](#)

Google Scholar: [Author Only Title Only Author and Title](#)

**Grant CE, Bailey TL, Noble WS (2011) FIMO: scanning for occurrences of a given motif. *Bioinformatics* 27: 1017-1018**

Pubmed: [Author and Title](#)

Google Scholar: [Author Only Title Only Author and Title](#)

**Greenfield A, Hafemeister C, Bonneau R (2013) Robust data-driven incorporation of prior knowledge into the inference of dynamic regulatory networks. *Bioinformatics* 29: 1060-1067**

Pubmed: [Author and Title](#)

Google Scholar: [Author Only Title Only Author and Title](#)

**Grossman RL (2019) Data Lakes, Clouds, and Commons: A Review of Platforms for Analyzing and Sharing Genomic Data. *Trends in Genetics* 35: 223-234**

Pubmed: [Author and Title](#)

Google Scholar: [Author Only Title Only Author and Title](#)

**Gupta P, Singh SK (2019) Gene Regulatory Networks: Current Updates and Applications in Plant Biology. In SP Singh, SK Upadhyay, A Pandey, S Kumar, eds, *Molecular Approaches in Plant Biology and Environmental Challenges*. Springer Singapore, Singapore, pp 395-417**

Pubmed: [Author and Title](#)

Google Scholar: [Author Only Title Only Author and Title](#)

**Han H, Cho J-W, Lee S, Yun A, Kim H, Bae D, Yang S, Kim CY, Lee M, Kim E, Lee S, Kang B, Jeong D, Kim Y, Jeon H-N, Jung H, Nam S, Chung M, Kim J-H, Lee I (2018) TRRUST v2: an expanded reference database of human and mouse transcriptional regulatory interactions. *Nucleic Acids Research* 46: D380-D386**

Pubmed: [Author and Title](#)

Google Scholar: [Author Only Title Only Author and Title](#)

**Katari MS, Nowicki SD, Aceituno FF, Nero D, Kelfer J, Thompson LP, Cabello JM, Davidson RS, Goldberg AP, Shasha DE, Coruzzi GM, Gutierrez RA (2010) VirtualPlant: a software platform to support systems biology research. *Plant Physiol* 152: 500-515**

Pubmed: [Author and Title](#)

Google Scholar: [Author Only Title Only Author and Title](#)

**Kim D, Paggi JM, Park C, Bennett C, Salzberg SL (2019) Graph-based genome alignment and genotyping with HISAT2 and HISAT-genotype. *Nature Biotechnology* 37: 907-915**

Pubmed: [Author and Title](#)

Google Scholar: [Author Only Title Only Author and Title](#)

**Krouk G, Mirowski P, LeCun Y, Shasha DE, Coruzzi GM (2010) Predictive network modeling of the high-resolution dynamic plant transcriptome in response to nitrate. *Genome Biol* 11: R123**

Pubmed: [Author and Title](#)

Google Scholar: [Author Only Title Only Author and Title](#)

**Kulkarni SR, Vandepoele K (2019) Inference of plant gene regulatory networks using data-driven methods: A practical overview. *Biochimica et Biophysica Acta (BBA) - Gene Regulatory Mechanisms*: 194447**

Pubmed: [Author and Title](#)

Google Scholar: [Author Only Title Only Author and Title](#)

**Kulkarni SR, Vanechoutte D, Van de Velde J, Vandepoele K (2018) TF2Network: predicting transcription factor regulators and gene regulatory networks in *Arabidopsis* using publicly available binding site information. *Nucleic Acids Res* 46: e31**

Pubmed: [Author and Title](#)

Google Scholar: [Author Only Title Only Author and Title](#)

**Lawrence M, Huber W, Pages H, Aboyoun P, Carlson M, Gentleman R, Morgan MT, Carey VJ (2013) Software for computing and annotating genomic ranges. *PLoS computational biology* 9: e1003118**

Pubmed: [Author and Title](#)

Google Scholar: [Author Only Title Only Author and Title](#)

**Lex A, Gehlenborg N, Strobel H, Vuillemot R, Pfister H (2014) UpSet: Visualization of Intersecting Sets. *IEEE Trans Vis Comput Graph* 20: 1983-1992**



Pubmed: [Author and Title](#)

Google Scholar: [Author Only Title Only Author and Title](#)

**Li C, Qiao Z, Qi W, Wang Q, Yuan Y, Yang X, Tang Y, Mei B, Lv Y, Zhao H, Xiao H, Song R (2015) Genome-wide characterization of cis-acting DNA targets reveals the transcriptional regulatory framework of opaque2 in maize. *Plant Cell* 27: 532-545**

Pubmed: [Author and Title](#)

Google Scholar: [Author Only Title Only Author and Title](#)

**Love MI, Huber W, Anders S (2014) Moderated estimation of fold change and dispersion for RNA-seq data with DESeq2. *Genome Biol* 15: 550**

Pubmed: [Author and Title](#)

Google Scholar: [Author Only Title Only Author and Title](#)

**Lu Z, Marand AP, Ricci WA, Ethridge CL, Zhang X, Schmitz RJ (2019) The prevalence, evolution and chromatin signatures of plant regulatory elements. *Nature Plants* 5: 1250-1259**

Pubmed: [Author and Title](#)

Google Scholar: [Author Only Title Only Author and Title](#)

**Marbach D, Costello JC, Küffner R, Vega NM, Prill RJ, Camacho DM, Allison KR, Aderhold A, Bonneau R, Chen Y (2012) Wisdom of crowds for robust gene network inference. *Nature methods* 9: 796**

Pubmed: [Author and Title](#)

Google Scholar: [Author Only Title Only Author and Title](#)

**Marchise C, Roudier F, Castaigns L, Bréhaut V, Blondet E, Colot V, Meyer C, Krapp A (2013) Nuclear retention of the transcription factor NLP7 orchestrates the early response to nitrate in plants. *Nature Communications* 4: 1713**

Pubmed: [Author and Title](#)

Google Scholar: [Author Only Title Only Author and Title](#)

**Mochida K, Koda S, Inoue K, Nishii R (2018) Statistical and Machine Learning Approaches to Predict Gene Regulatory Networks From Transcriptome Datasets. *Frontiers in Plant Science* 9: 1770**

Pubmed: [Author and Title](#)

Google Scholar: [Author Only Title Only Author and Title](#)

**Monteiro PT, Oliveira J, Pais P, Antunes M, Palma M, Cavalheiro M, Galocha M, Godinho CP, Martins LC, Bourbon N, Mota MN, Ribeiro RA, Viana R, Sá-Correia I, Teixeira MC (2019) YEASTRACT+: a portal for cross-species comparative genomics of transcription regulation in yeasts. *Nucleic Acids Research* 48: D642-D649**

Pubmed: [Author and Title](#)

Google Scholar: [Author Only Title Only Author and Title](#)

**Morohashi K, Casas MI, Falcone Ferreyra ML, Falcone Ferreyra L, Mejia-Guerra MK, Pourcel L, Yilmaz A, Feller A, Carvalho B, Emiliani J, Rodriguez E, Pellegrinet S, McMullen M, Casati P, Grotewold E (2012) A genome-wide regulatory framework identifies maize pericarp color1 controlled genes. *Plant Cell* 24: 2745-2764**

Pubmed: [Author and Title](#)

Google Scholar: [Author Only Title Only Author and Title](#)

**Nemie-Feyissa D, Olafsdottir SM, Heidari B, Lillo C (2014) Nitrogen depletion and small R3-MYB transcription factors affecting anthocyanin accumulation in Arabidopsis leaves. *Phytochemistry* 98: 34-40**

Pubmed: [Author and Title](#)

Google Scholar: [Author Only Title Only Author and Title](#)

**Neph S, Vierstra J, Stergachis AB, Reynolds AP, Haugen E, Vernet B, Thurman RE, John S, Sandstrom R, Johnson AK, Maurano MT, Humbert R, Rynes E, Wang H, Vong S, Lee K, Bates D, Diegel M, Roach V, Dunn D, Neri J, Schafer A, Hansen RS, Kutayavin T, Giste E, Weaver M, Canfield T, Sabo P, Zhang M, Balasundaram G, Byron R, MacCoss MJ, Akey JM, Bender MA, Groudine M, Kaul R, Stamatoyannopoulos JA (2012) An expansive human regulatory lexicon encoded in transcription factor footprints. *Nature* 489: 83-90**

Pubmed: [Author and Title](#)

Google Scholar: [Author Only Title Only Author and Title](#)

**O'Malley RC, Huang SC, Song L, Lewsey MG, Bartlett A, Nery JR, Galli M, Gallavotti A, Ecker JR (2016) Cistrome and Epicistrome Features Shape the Regulatory DNA Landscape. *Cell* 166: 1598**

Pubmed: [Author and Title](#)

Google Scholar: [Author Only Title Only Author and Title](#)

**Obayashi T, Aoki Y, Tadaka S, Kagaya Y, Kinoshita K (2018) ATTED-II in 2018: A Plant Coexpression Database Based on Investigation of the Statistical Property of the Mutual Rank Index. *Plant Cell Physiol* 59: e3**

Pubmed: [Author and Title](#)

Google Scholar: [Author Only Title Only Author and Title](#)

**Para A, Li Y, Marshall-Colon A, Varala K, Francoeur NJ, Moran TM, Edwards MB, Hackley C, Bargmann BO, Birnbaum KD, McCombie WR, Krouk G, Coruzzi GM (2014) Hit-and-run transcriptional control by bZIP1 mediates rapid nutrient signaling in Arabidopsis. *Proc Natl Acad Sci U S A* 111: 10371-10376**

Pubmed: [Author and Title](#)

Google Scholar: [Author Only Title Only Author and Title](#)

**Petralia F, Wang P, Yang J, Tu Z (2015) Integrative random forest for gene regulatory network inference. *Bioinformatics* 31: i197-205**

Pubmed: [Author and Title](#)

Google Scholar: [Author Only](#) [Title Only](#) [Author and Title](#)

**Petricka JJ, Winter CM, Benfey PN (2012) Control of Arabidopsis Root Development. Annual Review of Plant Biology 63: 563-590**

Pubmed: [Author and Title](#)

Google Scholar: [Author Only](#) [Title Only](#) [Author and Title](#)

**Phuc Le P, Friedman JR, Schug J, Brestelli JE, Parker JB, Bochkis IM, Kaestner KH (2005) Glucocorticoid receptor-dependent gene regulatory networks. PLoS Genet 1: e16**

Pubmed: [Author and Title](#)

Google Scholar: [Author Only](#) [Title Only](#) [Author and Title](#)

**Poultney CS, Gutiérrez RA, Katari MS, Gifford ML, Paley WB, Coruzzi GM, Shasha DE (2006) Sungear: interactive visualization and functional analysis of genomic datasets. Bioinformatics 23: 259-261**

Pubmed: [Author and Title](#)

Google Scholar: [Author Only](#) [Title Only](#) [Author and Title](#)

**Ricci WA, Lu Z, Ji L, Marand AP, Ethridge CL, Murphy NG, Noshay JM, Galli M, Mejia-Guerra MK, Colome-Tatche M, Johannes F, Rowley MJ, Corces VG, Zhai J, Scanlon MJ, Buckler ES, Gallavotti A, Springer NM, Schmitz RJ, Zhang X (2019) Widespread long-range cis-regulatory elements in the maize genome. Nat Plants 5: 1237-1249**

Pubmed: [Author and Title](#)

Google Scholar: [Author Only](#) [Title Only](#) [Author and Title](#)

**Rubin G, Tohge T, Matsuda F, Saito K, Scheible WR (2009) Members of the LBD family of transcription factors repress anthocyanin synthesis and affect additional nitrogen responses in Arabidopsis. Plant Cell 21: 3567-3584**

Pubmed: [Author and Title](#)

Google Scholar: [Author Only](#) [Title Only](#) [Author and Title](#)

**Rushton PJ, Macdonald H, Huttly AK, Lazarus CM, Hooley R (1995) Members of a new family of DNA-binding proteins bind to a conserved cis-element in the promoters of alpha-Amy2 genes. Plant Mol Biol 29: 691-702**

Pubmed: [Author and Title](#)

Google Scholar: [Author Only](#) [Title Only](#) [Author and Title](#)

**Santos-Zavaleta A, Salgado H, Gama-Castro S, Sanchez-Perez M, Gomez-Romero L, Ledezma-Tejeida D, Garcia-Sotelo JS, Alquicira-Hernandez K, Muniz-Rascado LJ, Pena-Loredo P, Ishida-Gutierrez C, Velazquez-Ramirez DA, Del Moral-Chavez V, Bonavides-Martinez C, Mendez-Cruz CF, Galagan J, Collado-Vides J (2019) RegulonDB v 10.5: tackling challenges to unify classic and high throughput knowledge of gene regulation in E. coli K-12. Nucleic Acids Res 47: D212-D220**

Pubmed: [Author and Title](#)

Google Scholar: [Author Only](#) [Title Only](#) [Author and Title](#)

**Slattery M, Zhou T, Yang L, Dantas Machado AC, Gordân R, Rohs R (2014) Absence of a simple code: how transcription factors read the genome. Trends in Biochemical Sciences 39: 381-399**

Pubmed: [Author and Title](#)

Google Scholar: [Author Only](#) [Title Only](#) [Author and Title](#)

**Song L, Huang S-sC, Wise A, Castanon R, Nery JR, Chen H, Watanabe M, Thomas J, Bar-Joseph Z, Ecker JR (2016) A transcription factor hierarchy defines an environmental stress response network. Science 354: aag1550**

Pubmed: [Author and Title](#)

Google Scholar: [Author Only](#) [Title Only](#) [Author and Title](#)

**Stender JD, Kim K, Charn TH, Komm B, Chang KCN, Kraus WL, Benner C, Glass CK, Katzenellenbogen BS (2010) Genome-Wide Analysis of Estrogen Receptor  $\alpha$  DNA Binding and Tethering Mechanisms Identifies Runx1 as a Novel Tethering Factor in Receptor-Mediated Transcriptional Activation. Molecular and Cellular Biology 30: 3943-3955**

Pubmed: [Author and Title](#)

Google Scholar: [Author Only](#) [Title Only](#) [Author and Title](#)

**Sullivan Alessandra M, Arsovski Andrej A, Lempe J, Bubb Kerry L, Weirauch Matthew T, Sabo Peter J, Sandstrom R, Thurman Robert E, Neph S, Reynolds Alex P, Stergachis Andrew B, Vernet B, Johnson Audra K, Haugen E, Sullivan Shawn T, Thompson A, Neri Fidencio V, III, Weaver M, Diegel M, Mnaimneh S, Yang A, Hughes Timothy R, Nemhauser Jennifer L, Queitsch C, Stamatoyannopoulos John A (2014) Mapping and Dynamics of Regulatory DNA and Transcription Factor Networks in A thaliana. Cell Reports 8: 2015-2030**

Pubmed: [Author and Title](#)

Google Scholar: [Author Only](#) [Title Only](#) [Author and Title](#)

**Tian F, Yang D-C, Meng Y-Q, Jin J, Gao G (2019) PlantRegMap: charting functional regulatory maps in plants. Nucleic Acids Research 48: D1104-D1113**

Pubmed: [Author and Title](#)

Google Scholar: [Author Only](#) [Title Only](#) [Author and Title](#)

**Toledo-Ortiz G, Huq E, Quail PH (2003) The Arabidopsis Basic/Helix-Loop-Helix Transcription Factor Family. The Plant Cell 15: 1749-1770**

Pubmed: [Author and Title](#)

Google Scholar: [Author Only](#) [Title Only](#) [Author and Title](#)

**Trigg SA, Garza RM, MacWilliams A, Nery JR, Bartlett A, Castanon R, Goubil A, Feeney J, O'Malley R, Huang SC, Zhang ZZ, Galli M, Ecker JR (2017) CrY2H-seq: a massively multiplexed assay for deep-coverage interactome mapping. Nat Methods 14: 819-825**

Pubmed: [Author and Title](#)

Google Scholar: [Author Only Title Only Author and Title](#)

**Tu X, Mejía-Guerra MK, Franco JAV, Tzeng D, Chu P-Y, Dai X, Li P, Buckler ES, Zhong S (2020) The transcription regulatory code of a plant leaf. *bioRxiv*: 2020.2001.2007.898056**

Pubmed: [Author and Title](#)

Google Scholar: [Author Only Title Only Author and Title](#)

**Varala K, Marshall-Colón A, Cirrone J, Brooks MD, Pasquino AV, Lérán S, Mittal S, Rock TM, Edwards MB, Kim GJ, Ruffel S, McCombie WR, Shasha D, Coruzzi GM (2018) Temporal transcriptional logic of dynamic regulatory networks underlying nitrogen signaling and use in plants. *Proceedings of the National Academy of Sciences* 115: 6494-6499**

Pubmed: [Author and Title](#)

Google Scholar: [Author Only Title Only Author and Title](#)

**Weirauch MT, Yang A, Albu M, Cote AG, Montenegro-Montero A, Drewe P, Najafabadi HS, Lambert SA, Mann I, Cook K, Zheng H, Goity A, van Bakel H, Lozano JC, Galli M, Lewsey MG, Huang E, Mukherjee T, Chen X, Reece-Hoyes JS, Govindarajan S, Shaulsky G, Walhout AJM, Bouget FY, Ratsch G, Larrondo LF, Ecker JR, Hughes TR (2014) Determination and inference of eukaryotic transcription factor sequence specificity. *Cell* 158: 1431-1443**

Pubmed: [Author and Title](#)

Google Scholar: [Author Only Title Only Author and Title](#)

**Yáñez-Cuna JO, Dinh HQ, Kvon EZ, Shlyueva D, Stark A (2012) Uncovering cis-regulatory sequence requirements for context-specific transcription factor binding. *Genome research* 22: 2018-2030**

Pubmed: [Author and Title](#)

Google Scholar: [Author Only Title Only Author and Title](#)

**Yazaki J, Galli M, Kim AY, Nito K, Aleman F, Chang KN, Carvunis A-R, Quan R, Nguyen H, Song L, Alvarez JM, Huang S-sC, Chen H, Ramachandran N, Altmann S, Gutiérrez RA, Hill DE, Schroeder JI, Chory J, LaBaer J, Vidal M, Braun P, Ecker JR (2016) Mapping transcription factor interactome networks using HaloTag protein arrays. *Proceedings of the National Academy of Sciences* 113: E4238-E4247**

Pubmed: [Author and Title](#)

Google Scholar: [Author Only Title Only Author and Title](#)

**Yilmaz A, Mejia-Guerra MK, Kurz K, Liang X, Welch L, Grotewold E (2010) AGRIS: the Arabidopsis Gene Regulatory Information Server, an update. *Nucleic Acids Research* 39: D1118-D1122**

Pubmed: [Author and Title](#)

Google Scholar: [Author Only Title Only Author and Title](#)
